# Supplementary material for: G protein-coupled receptors as novel therapeutic targets in non-small-cell lung cancer
Source: publisher site journal article supplement (doi:10.1515/mr-2025-0052), 2025-12-01
Supplement: Supplementary file 1 [file j_mr-2025-0052_suppl_001.pdf]

## Supplement Tables

**Table 1 Main GPCR families implicated in tumor biology**

| GPCR family (class)                        | Representative GPCR (example) | Representative ligand                                  | Tumor-related physiological functions                                                                                                                                       |
|--------------------------------------------|-------------------------------|--------------------------------------------------------|-----------------------------------------------------------------------------------------------------------------------------------------------------------------------------|
| Class A – Chemokine receptors              | CXCR4                         | CXCL12 (SDF-1 $\alpha$ )                               | Promotes tumor cell migration, invasion and angiogenesis; facilitates metastasis to distant organs <sup>[1]</sup>                                                           |
| Class A – Lysophospholipid receptors       | LPAR1 (LPA receptor)          | Lysophosphatidic acid (LPA)                            | Stimulates proliferation, survival and motility of cancer cells; remodels tumor micro-environment and immune response <sup>[2]</sup>                                        |
| Class A – Endothelin receptors             | EDNRA                         | Endothelin-1 (ET-1)                                    | Drives vasoconstriction, angiogenesis and epithelial-to-mesenchymal transition (EMT), enhancing invasiveness <sup>[3]</sup> <sup>[4]</sup>                                  |
| Class A – Prostanoid receptors             | PTGER2 (EP2)                  | Prostaglandin E <sub>2</sub> (PGE <sub>2</sub> )       | Activates cAMP/PKA signaling, supporting cell proliferation, immune evasion and angiogenesis <sup>[5]</sup> <sup>[6]</sup>                                                  |
| Class A – Orphan GPCRs (GPR35)             | GPR35                         | Kynurenic acid (and other endogenous metabolites)      | Modulates tumor-associated inflammation and cell migration; over-expressed in gastric, breast, colon and NSCLC <sup>[7]</sup> <sup>[8]</sup> <sup>[9]</sup> <sup>[10]</sup> |
| Class A – Orphan GPCRs (GPR55)             | GPR55                         | Lysophosphatidylinositol (LPI)                         | Enhances proliferation and metastasis in several cancers (e.g., ovarian), while showing context-dependent anti-proliferative effects in cholangiocarcinoma <sup>[11]</sup>  |
| Class A – OGR1 subfamily (GPR4)            | GPR4                          | Extracellular protons (acidic pH)                      | Senses tumor-associated acidosis, promoting angiogenesis and tumor growth <sup>[12]</sup> <sup>[13]</sup>                                                                   |
| Class B – Secretin family                  | VIPR1 (VPAC1)                 | Vasoactive intestinal peptide (VIP)                    | Stimulates cAMP signaling, supporting tumor cell survival and immune modulation <sup>[14]</sup> <sup>[15]</sup>                                                             |
| Class C – Metabotropic glutamate receptors | GRM1                          | Glutamate                                              | Drives MAPK/ERK activation, leading to proliferation and metastasis in melanoma and breast cancer <sup>[16]</sup> <sup>[17]</sup>                                           |
| Adhesion GPCRs                             | GPR56 (ADGRG1)                | Collagen III (and other extracellular matrix proteins) | Regulates cell adhesion, migration and angiogenesis; implicated in glioma and melanoma progression <sup>[18]</sup> <sup>[19]</sup>                                          |
| Adhesion GPCRs                             | GPR124                        | Unidentified extracellular ligands (e.g., VEGF-A)      | Promotes angiogenic sprouting and blood-brain barrier formation, facilitating glioma invasion <sup>[20]</sup>                                                               |

**Table 2 – Advanced GPCR-targeted antitumor agents in clinical development  
(2025)**

| Drug (generic)                         | GPCR target & mechanism of action                                                                                                         | Primary therapeutic indication (oncology)                                                           | Clinical trial phase*                              |
|----------------------------------------|-------------------------------------------------------------------------------------------------------------------------------------------|-----------------------------------------------------------------------------------------------------|----------------------------------------------------|
| Talquetamab (bispecific antibody)      | Binds GPRC5D on myeloma cells and CD3 on T cells → T-cell-mediated cytotoxicity[21]                                                       | Relapsed/refractory multiple myeloma (RRMM)                                                         | Phase I/II (MonumenTAL-1, pivotal) <sup>[22]</sup> |
| Motixafortide (BL-8040)                | Peptide antagonist of CXCR4 → blocks CXCL12-CXCR4 axis, mobilises immune cells into tumor micro-environment                               | Metastatic pancreatic ductal adenocarcinoma (PDAC) in combination with pembrolizumab ± chemotherapy | Phase II (COMBAT/KEYNOTE-202) <sup>[23]</sup>      |
| Plerixafor (AMD3100)                   | Small-molecule CXCR4 antagonist → disrupts CXCL12-CXCR4 signaling, enhances immune infiltration                                           | Metastatic PDAC (CXCR4-high) combined with pembrolizumab (BL-8040 trial)                            | Phase II (BL-8040 + pembrolizumab) <sup>[24]</sup> |
| Navarixin (AZ-D281)                    | Small-molecule CXCR2 antagonist → allosteric inhibition of CXCR2, reduces neutrophil-mediated tumor support                               | PDAC (gemcitabine-resistant) – combination with gemcitabine                                         | Phase I/II (early-stage oncology) <sup>[25]</sup>  |
| BMS-813160 (dual CCR2/CCR5 antagonist) | Dual antagonism of CCR2 and CCR5 → blocks CCL2/CCR2 and CCL5/CCR5 chemokine pathways that promote tumor-associated macrophage recruitment | Hepatocellular carcinoma (high-risk NASH-related) and solid tumours under investigation             | Phase I (dose-escalation) <sup>[26]</sup>          |

**Table 3. NSCLC- NSCLC-associated GPCRs**

| GPCRs                                                         | Class   | Integration of gene expression from cancer and healthy samples | Cognate Ligands                                                                                             | Roles                                                                                      | Reference                          |
|---------------------------------------------------------------|---------|----------------------------------------------------------------|-------------------------------------------------------------------------------------------------------------|--------------------------------------------------------------------------------------------|------------------------------------|
| E prostanoïd (EP) receptors                                   | Class A | Up/ down                                                       | PGE2                                                                                                        | mediate activation of MAPK/ERK-induced cellular proliferation, invasion                    | [27]                               |
| C-X-C chemokine receptor 2 (CXCR2)                            | Class A | UP                                                             | CXCL1, CXCL2, CXCL3, CXCL5, CXCL7                                                                           | Promote cell proliferation, migration, and invasion and apoptosis                          | [28] [29]                          |
| GPR78                                                         | Class A | UP                                                             | orphan GPCR                                                                                                 | Promote cell migration and metastasis                                                      | [30]                               |
| Protease-activated receptor 2 (PAR2)                          | Class A | UP                                                             | trypsin, tryptase, coagulation factor Xa (FXa), tissue factor (TF)-factor VIIa (FVIIa) complex and testisin | Promote proliferation and migration of lung cancer cells; anti-apoptosis                   | [31] [32] [33] [34] [35] [36]      |
| C-X-C chemokine receptor 4 (CXCR4)                            | Class A | UP                                                             | CXCL12                                                                                                      | Promote motility, invasion and metastasis                                                  | [37] [38] [39] [40] [41] [42] [43] |
| G-protein coupled receptor family C group 5 member A (GPRC5A) | Class C | DOWN                                                           | orphan GPCR                                                                                                 | Reduce tumor differentiation, inflammation and tumorigenesis                               | [44] [45] [46] [47] [48] [49]      |
| Somatostatin receptor type 2 (SSTR2)                          | Class A | DOWN                                                           | acid polypeptide, somatostatin,                                                                             | induces cell cycle arrest, cancer cell apoptosis, cell invasion and restores gap junctions | [50] [51]                          |

**Table 4. GPCR-based treatments in lung cancer ((Created with GPCRdb).**

| Drug           | Gene  | Protein          | Receptor family        | Ligand type          | Class | Phase | Association score |
|----------------|-------|------------------|------------------------|----------------------|-------|-------|-------------------|
| ILOPROST       | PI2R  | IP receptor      | Prostanoid receptors   | Lipid receptors      | A     | II    | 0.074             |
| Zibotentan     | EDNRA | ETA receptor     | Endothelin receptors   | Peptide receptors    | A     | II    | 0.08              |
| Mogamulizu mab | CCR4  | CCR4             | Chemokine receptors    | Protein receptors    | A     | I     | 0.104             |
| FLX475         | CCR4  | CCR4             | Chemokine receptors    | Protein receptors    | A     | II    | 0.104             |
| Anamorelin     | GHSR  | Ghrelin receptor | Ghrelin receptors      | Peptide receptors    | A     | IV    | 0.076             |
| Grapiprant     | PE2R4 | EP4 receptor     | Prostanoid receptors   | Lipid receptors      | A     | I     | 0.024             |
| ONO-4578       | PE2R4 | EP4 receptor     | Prostanoid receptors   | Lipid receptors      | A     | I     | 0.024             |
| PBF-509        | AA2AR | A2A receptor     | Adenosine receptors    | Nucleotide receptors | A     | II    | 0.12              |
| AB928          | AA2AR | A2A receptor     | Adenosine receptors    | Nucleotide receptors | A     | II    | 0.12              |
| AB928          | AA2BR | A2B receptor     | Adenosine receptors    | Nucleotide receptors | A     | II    | 0.109             |
| SX-682         | CXCR1 | CXCR1            | Chemokine receptors    | Protein receptors    | A     | II    | 0.109             |
| SX-682         | CXCR2 | CXCR2            | Chemokine receptors    | Protein receptors    | A     | II    | 0.108             |
| TT-816         | CNR2  | CB2 receptor     | Cannabinoid receptors  | Lipid receptors      | A     | II    | 0.045             |
| Taladegib      | SMO   | SMO              | Frizzled               | Protein receptors    | F     | II    | 0.299             |
| Vismodegib     | SMO   | SMO              | Frizzled               | Protein receptors    | F     | II    | 0.299             |
| PASIREOTI DE   | SSR1  | SST1 receptor    | Somatostatin receptors | Peptide receptors    | A     | II    | 0.076             |
| PASIREOTI DE   | SSR2  | SST2 receptor    | Somatostatin receptors | Peptide receptors    | A     | II    | 0.088             |
| PASIREOTI DE   | SSR3  | SST3 receptor    | Somatostatin receptors | Peptide receptors    | A     | II    | 0.074             |
| PASIREOTI DE   | SSR5  | SST5 receptor    | Somatostatin receptors | Peptide receptors    | A     | II    | 0.075             |

**Table 5 Clinical trials of anti-cancer drugs targeting GPCR**  
(Data source:<https://clinicaltrials.gov/>)

| Study Title                                                                  | Drug     | Serious Adverse Events                                                                                                                                                                                                                                                                                                                                                                                                                                                          |                                 |                                | Other Adverse Events                                       |                                 |                                |
|------------------------------------------------------------------------------|----------|---------------------------------------------------------------------------------------------------------------------------------------------------------------------------------------------------------------------------------------------------------------------------------------------------------------------------------------------------------------------------------------------------------------------------------------------------------------------------------|---------------------------------|--------------------------------|------------------------------------------------------------|---------------------------------|--------------------------------|
| Iloprost in Preventing Lung Cancer in Patients at High Risk for This Disease | ILOPROST | arm/group Title                                                                                                                                                                                                                                                                                                                                                                                                                                                                 | Iloprost Affected / at Risk (%) | Placebo Affected / at Risk (%) | arm/group Title                                            | Iloprost Affected / at Risk (%) | Placebo Affected / at Risk (%) |
|                                                                              |          | Total                                                                                                                                                                                                                                                                                                                                                                                                                                                                           | 3/75 (4.00%)                    | 6/77 (7.79%)                   | Total                                                      | 52/75 (69.33%)                  | 32/77 (41.56%)                 |
|                                                                              |          | General disorders                                                                                                                                                                                                                                                                                                                                                                                                                                                               |                                 |                                | Gastrointestinal disorders                                 |                                 |                                |
|                                                                              |          | Hospitalization†[1]                                                                                                                                                                                                                                                                                                                                                                                                                                                             | 3/75 (4.00%)                    | 4/77 (5.19%)                   | Nausea†                                                    | 12/75 (16.00%)                  | 6/77 (7.79%)                   |
|                                                                              |          | Death†[2]                                                                                                                                                                                                                                                                                                                                                                                                                                                                       | 0/75 (0.00%)                    | 1/77 (1.30%)                   | General disorders                                          |                                 |                                |
|                                                                              |          | Nervous system disorders                                                                                                                                                                                                                                                                                                                                                                                                                                                        |                                 |                                | Pain - Other†                                              | 12/75 (16.00%)                  | 6/77 (7.79%)                   |
|                                                                              |          | CVA Stroke †[3]                                                                                                                                                                                                                                                                                                                                                                                                                                                                 | 0/75 (0.00%)                    | 1/77 (1.30%)                   | Fatigue†                                                   | 8/75 (10.67%)                   | 2/77 (2.60%)                   |
|                                                                              |          | † Indicates events were collected by systematic assessment [1] SAE(Serious Adverse Event) was reported on subjects who were hospitalized. None of these subjects had > Grade 3 toxicities reported, and the hospitalizations were not attributed to either the drug or placebo. [2] Subject's death was reported as an SAE. The death was not attributed to being on the clinical trial. The subject was on a placebo [3] Patient suffered a stroke. Patient was on the Placebo |                                 |                                | Investigations                                             |                                 |                                |
|                                                                              |          |                                                                                                                                                                                                                                                                                                                                                                                                                                                                                 |                                 |                                | Metabolic/Laboratory - Other†                              | 3/75 (4.00%)                    | 6/77 (7.79%)                   |
|                                                                              |          |                                                                                                                                                                                                                                                                                                                                                                                                                                                                                 |                                 |                                | Musculoskeletal and connective tissue disorders            |                                 |                                |
|                                                                              |          |                                                                                                                                                                                                                                                                                                                                                                                                                                                                                 |                                 |                                | Myalgia (muscle pain)†                                     | 13/75 (17.33%)                  | 1/77 (1.30%)                   |
|                                                                              |          |                                                                                                                                                                                                                                                                                                                                                                                                                                                                                 |                                 |                                | Nervous system disorders                                   |                                 |                                |
|                                                                              |          |                                                                                                                                                                                                                                                                                                                                                                                                                                                                                 |                                 |                                | Headache†                                                  | 40/75 (53.33%)                  | 17/77 (22.08%)                 |
|                                                                              |          |                                                                                                                                                                                                                                                                                                                                                                                                                                                                                 |                                 |                                | Neuropathic pain†                                          | 7/75 (9.33%)                    | 1/77 (1.30%)                   |
|                                                                              |          |                                                                                                                                                                                                                                                                                                                                                                                                                                                                                 |                                 |                                | Vascular disorders                                         |                                 |                                |
|                                                                              |          |                                                                                                                                                                                                                                                                                                                                                                                                                                                                                 |                                 |                                | Flushing†                                                  | 18/75 (24.00%)                  | 6/77 (7.79%)                   |
|                                                                              |          |                                                                                                                                                                                                                                                                                                                                                                                                                                                                                 |                                 |                                | † Indicates events were collected by systematic assessment |                                 |                                |

| Study Title                                                   | Drug       | Serious Adverse Events                                              |                        |                        | Other Adverse Events                   |                        |                        |
|---------------------------------------------------------------|------------|---------------------------------------------------------------------|------------------------|------------------------|----------------------------------------|------------------------|------------------------|
| ZD4054 (Zibotentan) Phase II Non-Small Cell Lung Cancer Study | zibotentan | arm/group Title                                                     | placebo+ pemetrexed    | ZD4054+ pemetrexed     | arm/group Title                        | Placebo+ pemetrexed    | ZD4054+ pemetrexed     |
|                                                               |            |                                                                     | Affected / at Risk (%) | Affected / at Risk (%) |                                        | Affected / at Risk (%) | Affected / at Risk (%) |
|                                                               |            | Total                                                               | 7/30 (23.33%)          | 4/36 (11.11%)          | Total                                  | 22/30 (73.33%)         | 20/36 (55.56%)         |
|                                                               |            | Blood and lymphatic system disorders                                |                        |                        | Blood and lymphatic system disorders   |                        |                        |
|                                                               |            | Anaemia†1                                                           | 1/30 (3.33%)           | 0/36 (0.00%)           | Anaemia†1                              | 8/30 (26.67%)          | 7/36 (19.44%)          |
|                                                               |            | Febrile Bone Marrow Aplasia†1                                       | 1/30 (3.33%)           | 0/36 (0.00%)           | Neutropenia†1                          | 5/30 (16.67%)          | 1/36 (2.78%)           |
|                                                               |            | Pancytopenia†1                                                      | 0/30 (0.00%)           | 1/36 (2.78%)           | Leukopenia†1                           | 2/30 (6.67%)           | 0/36 (0.00%)           |
|                                                               |            | Cardiac disorders                                                   |                        |                        | Gastrointestinal disorders             |                        |                        |
|                                                               |            | Right Ventricular Failure†1                                         | 1/30 (3.33%)           | 0/36 (0.00%)           | Nausea†1                               | 2/30 (6.67%)           | 5/36 (13.89%)          |
|                                                               |            | Gastrointestinal disorders                                          |                        |                        | Constipation†1                         | 2/30 (6.67%)           | 1/36 (2.78%)           |
|                                                               |            | Pancreatitis†1                                                      | 1/30 (3.33%)           | 0/36 (0.00%)           | Vomiting†1                             | 2/30 (6.67%)           | 2/36 (5.56%)           |
|                                                               |            | Upper Gastrointestinal Haemorrhage†1                                | 1/30 (3.33%)           | 0/36 (0.00%)           | General disorders                      |                        |                        |
|                                                               |            | General disorders                                                   |                        |                        | Oedema Peripheral†1                    | 1/30 (3.33%)           | 4/36 (11.11%)          |
|                                                               |            | Adverse Drug Reaction†1                                             | 1/30 (3.33%)           | 0/36 (0.00%)           | Fatigue†1                              | 1/30 (3.33%)           | 2/36 (5.56%)           |
|                                                               |            | Asthenia†1                                                          | 1/30 (3.33%)           | 0/36 (0.00%)           | Hepatobiliary disorders                |                        |                        |
|                                                               |            | Infections and infestations                                         |                        |                        | Hypertransaminasaemia †1               | 2/30 (6.67%)           | 0/36 (0.00%)           |
|                                                               |            | Erysipelas†1                                                        | 0/30 (0.00%)           | 1/36 (2.78%)           | Infections and infestations            |                        |                        |
|                                                               |            | Lung Infection†1                                                    | 0/30 (0.00%)           | 1/36 (2.78%)           | Bacterial Infection†1                  | 2/30 (6.67%)           | 0/36 (0.00%)           |
|                                                               |            | Neoplasms benign, malignant and unspecified (incl cysts and polyps) |                        |                        | Body Temperature Increased†1           | 3/30 (10.00%)          | 2/36 (5.56%)           |
|                                                               |            | Metastases To Central Nervous System†1                              | 1/30 (3.33%)           | 0/36 (0.00%)           | Brain Natriuretic Peptide Increased†1  | 0/30 (0.00%)           | 3/36 (8.33%)           |
|                                                               |            | Renal and urinary disorders                                         |                        |                        | Weight Decreased†1                     | 3/30 (10.00%)          | 3/36 (8.33%)           |
|                                                               |            | Renal Failure†1                                                     | 1/30 (3.33%)           | 0/36 (0.00%)           | Alanine Aminotransferase Increased†1   | 2/30 (6.67%)           | 2/36 (5.56%)           |
|                                                               |            | Respiratory, thoracic and mediastinal disorders                     |                        |                        | Aspartate Aminotransferase Increased†1 | 1/30 (3.33%)           | 2/36 (5.56%)           |

| Study Title                                                                     | Drug       | Serious Adverse Events                                                                                     |                 |                 | Other Adverse Events                                                                                |                  |                 |
|---------------------------------------------------------------------------------|------------|------------------------------------------------------------------------------------------------------------|-----------------|-----------------|-----------------------------------------------------------------------------------------------------|------------------|-----------------|
| ZD4054<br>(Zibotentan)<br>Phase II<br>Non-Small<br>Cell Lung<br>Cancer<br>Study | zibotentan | Dyspnoea†1                                                                                                 | 0/30<br>(0.00%) | 1/36<br>(2.78%) | Metabolism and<br>nutrition disorders                                                               |                  |                 |
|                                                                                 |            | †<br>Indicates events were collected by<br>systematic assessment<br>1<br>Term from vocabulary, MedDRA 12.1 |                 |                 | Decreased Appetite†1                                                                                | 1/30<br>(3.33%)  | 2/36<br>(5.56%) |
|                                                                                 |            |                                                                                                            |                 |                 | Hypokalaemia†1                                                                                      | 2/30<br>(6.67%)  | 0/36<br>(0.00%) |
|                                                                                 |            |                                                                                                            |                 |                 | Musculoskeletal and<br>connective tissue<br>disorders                                               |                  |                 |
|                                                                                 |            |                                                                                                            |                 |                 | Musculoskeletal<br>Pain†1                                                                           | 3/30<br>(10.00%) | 0/36<br>(0.00%) |
|                                                                                 |            |                                                                                                            |                 |                 | Back Pain†1                                                                                         | 2/30<br>(6.67%)  | 1/36<br>(2.78%) |
|                                                                                 |            |                                                                                                            |                 |                 | Nervous system<br>disorders                                                                         |                  |                 |
|                                                                                 |            |                                                                                                            |                 |                 | Headache†1                                                                                          | 1/30<br>(3.33%)  | 3/36<br>(8.33%) |
|                                                                                 |            |                                                                                                            |                 |                 | Psychiatric disorders                                                                               |                  |                 |
|                                                                                 |            |                                                                                                            |                 |                 | Anxiety†1                                                                                           | 2/30<br>(6.67%)  | 0/36<br>(0.00%) |
|                                                                                 |            |                                                                                                            |                 |                 | Insomnia†1                                                                                          | 2/30<br>(6.67%)  | 0/36<br>(0.00%) |
|                                                                                 |            |                                                                                                            |                 |                 | Respiratory, thoracic<br>and mediastinal<br>disorders                                               |                  |                 |
|                                                                                 |            |                                                                                                            |                 |                 | Cough†1                                                                                             | 0/30<br>(0.00%)  | 2/36<br>(5.56%) |
|                                                                                 |            |                                                                                                            |                 |                 | Skin and<br>subcutaneous tissue<br>disorders                                                        |                  |                 |
|                                                                                 |            |                                                                                                            |                 |                 | Rash†1                                                                                              | 1/30<br>(3.33%)  | 3/36<br>(8.33%) |
|                                                                                 |            |                                                                                                            |                 |                 | Alopecia†1                                                                                          | 2/30<br>(6.67%)  | 2/36<br>(5.56%) |
|                                                                                 |            |                                                                                                            |                 |                 | †Indicates events were collected by systematic<br>assessment<br>1 Term from vocabulary, MedDRA 12.1 |                  |                 |
|                                                                                 |            | Lung<br>Infection†1                                                                                        | 0/30<br>(0.00%) | 1/36<br>(2.78%) | Bacterial Infection†1                                                                               | 2/30<br>(6.67%)  | 0/36<br>(0.00%) |
|                                                                                 |            | Neoplasms<br>benign,<br>malignant and<br>unspecified<br>(incl cysts and<br>polyps)                         |                 |                 | Body Temperature<br>Increased†1                                                                     | 3/30<br>(10.00%) | 2/36<br>(5.56%) |
|                                                                                 |            | Metastases To<br>Central<br>Nervous<br>System†1                                                            | 1/30<br>(3.33%) | 0/36<br>(0.00%) | Brain Natriuretic<br>Peptide Increased†1                                                            | 0/30<br>(0.00%)  | 3/36<br>(8.33%) |
|                                                                                 |            | Renal and<br>urinary<br>disorders                                                                          |                 |                 | Weight Decreased†1                                                                                  | 3/30<br>(10.00%) | 3/36<br>(8.33%) |
|                                                                                 |            | Renal Failure†1                                                                                            | 1/30<br>(3.33%) | 0/36<br>(0.00%) | Alanine<br>Aminotransferase<br>Increased†1                                                          | 2/30<br>(6.67%)  | 2/36<br>(5.56%) |
|                                                                                 |            | Respiratory,<br>thoracic and<br>mediastinal<br>disorders                                                   |                 |                 | Aspartate<br>Aminotransferase<br>Increased†1                                                        | 1/30<br>(3.33%)  | 2/36<br>(5.56%) |
|                                                                                 |            | Dyspnoea†1                                                                                                 | 0/30<br>(0.00%) | 1/36<br>(2.78%) | Metabolism and<br>nutrition disorders                                                               |                  |                 |

| Study Title                                                                     | Drug       | Serious Adverse Events                                                                                        | Other Adverse Events                                                                                    |                 |                 |
|---------------------------------------------------------------------------------|------------|---------------------------------------------------------------------------------------------------------------|---------------------------------------------------------------------------------------------------------|-----------------|-----------------|
| ZD4054<br>(Zibotentan)<br>Phase II<br>Non-Small<br>Cell Lung<br>Cancer<br>Study | zibotentan | †<br>Indicates events were collected<br>by systematic assessment<br>1<br>Term from vocabulary,<br>MedDRA 12.1 | Decreased<br>Appetite†1                                                                                 | 1/30 (3.33%)    | 2/36<br>(5.56%) |
|                                                                                 |            |                                                                                                               | Hypokalaemia†1                                                                                          | 2/30 (6.67%)    | 0/36<br>(0.00%) |
|                                                                                 |            |                                                                                                               | Musculoskeletal and<br>connective tissue<br>disorders                                                   |                 |                 |
|                                                                                 |            |                                                                                                               | Musculoskeletal Pain†1                                                                                  | 3/30 (10.00%)   | 0/36<br>(0.00%) |
|                                                                                 |            |                                                                                                               | Back Pain†1                                                                                             | 2/30 (6.67%)    | 1/36<br>(2.78%) |
|                                                                                 |            |                                                                                                               | Nervous<br>system<br>disorders                                                                          |                 |                 |
|                                                                                 |            |                                                                                                               | Headache†1                                                                                              | 1/30 (3.33%)    | 3/36<br>(8.33%) |
|                                                                                 |            |                                                                                                               | Psychiatric<br>disorders                                                                                |                 |                 |
|                                                                                 |            |                                                                                                               | Anxiety†1                                                                                               | 2/30 (6.67%)    | 0/36<br>(0.00%) |
|                                                                                 |            |                                                                                                               | Insomnia†1                                                                                              | 2/30<br>(6.67%) | 0/36 (0.00%)    |
|                                                                                 |            |                                                                                                               | Respiratory,<br>thoracic and<br>mediastinal<br>disorders                                                |                 |                 |
|                                                                                 |            |                                                                                                               | Cough†1                                                                                                 | 0/30<br>(0.00%) | 2/36 (5.56%)    |
|                                                                                 |            |                                                                                                               | Skin and<br>subcutaneous<br>tissue<br>disorders                                                         |                 |                 |
|                                                                                 |            |                                                                                                               | Rash†1                                                                                                  | 1/30<br>(3.33%) | 3/36 (8.33%)    |
|                                                                                 |            |                                                                                                               | Alopecia†1                                                                                              | 2/30<br>(6.67%) | 2/36 (5.56%)    |
|                                                                                 |            |                                                                                                               | †<br>Indicates events were collected by systematic assessment<br>1<br>Term from vocabulary, MedDRA 12.1 |                 |                 |



| Study Title                                                                    | Drug          | Serious Adverse Events                          |                           |                                                 | Other Adverse Events                 |                           |  |
|--------------------------------------------------------------------------------|---------------|-------------------------------------------------|---------------------------|-------------------------------------------------|--------------------------------------|---------------------------|--|
| Study of Mogamulizumab + Docetaxel in Subjects With Non-small Cell Lung Cancer | mogamulizumab | arm/group Title                                 | Mogamulizumab + Docetaxel | arm/group Title                                 | arm/group Title                      | Mogamulizumab + Docetaxel |  |
|                                                                                |               |                                                 | Affected / at Risk (%)    |                                                 |                                      | Affected / at Risk (%)    |  |
|                                                                                |               | Total                                           | 6/13 (46.15%)             | Total                                           | Total                                | 12/13 (92.31%)            |  |
|                                                                                |               | Blood and lymphatic system disorders            |                           | Blood and lymphatic system disorders            | Blood and lymphatic system disorders |                           |  |
|                                                                                |               | Febrile neutropenia                             | 1/13 (7.69%)              | Febrile neutropenia                             | Neutrophil count decreased           | 4/13 (30.77%)             |  |
|                                                                                |               | Cardiac disorders                               |                           | Cardiac disorders                               | Neutropenia                          | 2/13 (15.38%)             |  |
|                                                                                |               | Acute myocardial infarction                     | 1/13 (7.69%)              | Acute myocardial infarction                     | Anaemia                              | 1/13 (7.69%)              |  |
|                                                                                |               | Atrial fibrillation                             | 1/13 (7.69%)              | Atrial fibrillation                             | Thrombocytopenia                     | 1/13 (7.69%)              |  |
|                                                                                |               | Cardiac failure congestive                      | 1/13 (7.69%)              | Cardiac failure congestive                      | Cardiac disorders                    |                           |  |
|                                                                                |               | Gastrointestinal disorders                      |                           | Gastrointestinal disorders                      | Cardiac failure congestive           | 2/13 (15.38%)             |  |
|                                                                                |               | Vomiting                                        | 1/13 (7.69%)              | Vomiting                                        | Atrial fibrillation                  | 2/13 (15.38%)             |  |
|                                                                                |               | General disorders                               |                           | General disorders                               | Eye disorders                        |                           |  |
|                                                                                |               | Pyrexia                                         | 1/13 (7.69%)              | Pyrexia                                         | Deafness                             | 1/13 (7.69%)              |  |
|                                                                                |               | Infections and infestations                     |                           | Infections and infestations                     | Gastrointestinal disorders           |                           |  |
|                                                                                |               | Sepsis                                          | 2/13 (15.38%)             | Sepsis                                          | Nausea                               | 5/13 (38.46%)             |  |
|                                                                                |               | Pneumonia Bacterial                             | 1/13 (7.69%)              | Pneumonia Bacterial                             | Diarrhea                             | 3/13 (23.08%)             |  |
|                                                                                |               | Septic shock                                    | 1/13 (7.69%)              | Septic shock                                    | Vomiting                             | 2/13 (15.38%)             |  |
|                                                                                |               | Metabolism and nutrition disorders              |                           | Metabolism and nutrition disorders              | Haemorrhoids                         | 1/13 (7.69%)              |  |
|                                                                                |               | Dehydration                                     | 1/13 (7.69%)              | Dehydration                                     | Dyspepsia                            | 1/13 (7.69%)              |  |
|                                                                                |               | Renal and urinary disorders                     |                           | Renal and urinary disorders                     | Abdominal hernia                     | 1/13 (7.69%)              |  |
|                                                                                |               | Renal failure acute                             | 1/13 (7.69%)              | Renal failure acute                             | Stomatitis                           | 1/13 (7.69%)              |  |
|                                                                                |               | Respiratory, thoracic and mediastinal disorders |                           | Respiratory, thoracic and mediastinal disorders | Abdominal pain                       | 1/13 (7.69%)              |  |
|                                                                                |               | Pneumonia                                       | 2/13 (15.38%)             | Pneumonia                                       | General disorders                    |                           |  |
|                                                                                |               | Vascular disorders                              |                           | Vascular disorders                              | Fatigue                              | 6/13 (46.15%)             |  |
|                                                                                |               | Hypotension                                     | 1/13 (7.69%)              | Hypotension                                     | Pyrexia                              | 4/13 (30.77%)             |  |

| Study Title                                                                    | Drug          | Serious Adverse Events |                           |                 | Other Adverse Events                           |                           |  |
|--------------------------------------------------------------------------------|---------------|------------------------|---------------------------|-----------------|------------------------------------------------|---------------------------|--|
| Study of Mogamulizumab + Docetaxel in Subjects With Non-small Cell Lung Cancer | mogamulizumab | arm/group Title        | Mogamulizumab + Docetaxel | arm/group Title | arm/group Title                                | Mogamulizumab + Docetaxel |  |
|                                                                                |               |                        | Affected / at Risk (%)    |                 |                                                | Affected / at Risk (%)    |  |
|                                                                                |               |                        |                           |                 | Pain                                           | 2/13 (15.38%)             |  |
|                                                                                |               |                        |                           |                 | Asthenia                                       | 1/13 (7.69%)              |  |
|                                                                                |               |                        |                           |                 | Chest pain                                     | 1/13 (7.69%)              |  |
|                                                                                |               |                        |                           |                 | Peripheral swelling                            | 1/13 (7.69%)              |  |
|                                                                                |               |                        |                           |                 | Chills                                         | 1/13 (7.69%)              |  |
|                                                                                |               |                        |                           |                 | Local swelling                                 | 1/13 (7.69%)              |  |
|                                                                                |               |                        |                           |                 | Oedema peripheral                              | 1/13 (7.69%)              |  |
|                                                                                |               |                        |                           |                 | Infections and infestations                    |                           |  |
|                                                                                |               |                        |                           |                 | Pneumonia                                      | 2/13 (15.38%)             |  |
|                                                                                |               |                        |                           |                 | Sepsis                                         | 2/13 (15.38%)             |  |
|                                                                                |               |                        |                           |                 | Thrush                                         | 1/13 (7.69%)              |  |
|                                                                                |               |                        |                           |                 | Oral candidiasis                               | 1/13 (7.69%)              |  |
|                                                                                |               |                        |                           |                 | Urinary tract infection                        | 1/13 (7.69%)              |  |
|                                                                                |               |                        |                           |                 | Injury, poisoning and procedural complications |                           |  |
|                                                                                |               |                        |                           |                 | Procedural site reaction                       | 1/13 (7.69%)              |  |
|                                                                                |               |                        |                           |                 | Laceration                                     | 1/13 (7.69%)              |  |
|                                                                                |               |                        |                           |                 | Fall                                           | 1/13 (7.69%)              |  |
|                                                                                |               |                        |                           |                 | Post procedural oedema                         | 1/13 (7.69%)              |  |
|                                                                                |               |                        |                           |                 | Infusion related reaction                      | 1/13 (7.69%)              |  |
|                                                                                |               |                        |                           |                 | Investigations                                 |                           |  |
|                                                                                |               |                        |                           |                 | Platelet count decreased                       | 1/13 (7.69%)              |  |
|                                                                                |               |                        |                           |                 | Metabolism and nutrition disorders             |                           |  |

| Study Title                                                                    | Drug          | Serious Adverse Events |                           |                 | Other Adverse Events                                                |                           |  |
|--------------------------------------------------------------------------------|---------------|------------------------|---------------------------|-----------------|---------------------------------------------------------------------|---------------------------|--|
| Study of Mogamulizumab + Docetaxel in Subjects With Non-small Cell Lung Cancer | mogamulizumab | arm/group Title        | Mogamulizumab + Docetaxel | arm/group Title | arm/group Title                                                     | Mogamulizumab + Docetaxel |  |
|                                                                                |               |                        | Affected / at Risk (%)    |                 |                                                                     | Affected / at Risk (%)    |  |
|                                                                                |               |                        |                           |                 | Decreased appetite                                                  | 4/13 (30.77%)             |  |
|                                                                                |               |                        |                           |                 | Dehydration                                                         | 3/13 (23.08%)             |  |
|                                                                                |               |                        |                           |                 | Weight decreased                                                    | 2/13 (15.38%)             |  |
|                                                                                |               |                        |                           |                 | Hyperuricaemia                                                      | 1/13 (7.69%)              |  |
|                                                                                |               |                        |                           |                 | Hypomagnesaemia                                                     | 1/13 (7.69%)              |  |
|                                                                                |               |                        |                           |                 | Hypokalaemia                                                        | 1/13 (7.69%)              |  |
|                                                                                |               |                        |                           |                 | Gout                                                                | 1/13 (7.69%)              |  |
|                                                                                |               |                        |                           |                 | Musculoskeletal and connective tissue disorders                     |                           |  |
|                                                                                |               |                        |                           |                 | Arthralgia                                                          | 2/13 (15.38%)             |  |
|                                                                                |               |                        |                           |                 | Musculoskeletal pain                                                | 1/13 (7.69%)              |  |
|                                                                                |               |                        |                           |                 | Bone pain                                                           | 1/13 (7.69%)              |  |
|                                                                                |               |                        |                           |                 | Musculoskeletal chest pain                                          | 1/13 (7.69%)              |  |
|                                                                                |               |                        |                           |                 | Back pain                                                           | 1/13 (7.69%)              |  |
|                                                                                |               |                        |                           |                 | Myalgia                                                             | 1/13 (7.69%)              |  |
|                                                                                |               |                        |                           |                 | Neck pain                                                           | 1/13 (7.69%)              |  |
|                                                                                |               |                        |                           |                 | Neoplasms benign, malignant and unspecified (incl cysts and polyps) |                           |  |
|                                                                                |               |                        |                           |                 | Metastases to central nervous system                                | 1/13 (7.69%)              |  |
|                                                                                |               |                        |                           |                 | Nervous system disorders                                            |                           |  |
|                                                                                |               |                        |                           |                 | Paraesthesia                                                        | 2/13 (15.38%)             |  |
|                                                                                |               |                        |                           |                 | Dizziness                                                           | 1/13 (7.69%)              |  |
|                                                                                |               |                        |                           |                 | Balance disorder                                                    | 1/13 (7.69%)              |  |
|                                                                                |               |                        |                           |                 | Neuropathy peripheral                                               | 1/13 (7.69%)              |  |

| Study Title                                                                    | Drug          | Serious Adverse Events |                           |                 | Other Adverse Events                            |                           |  |
|--------------------------------------------------------------------------------|---------------|------------------------|---------------------------|-----------------|-------------------------------------------------|---------------------------|--|
| Study of Mogamulizumab + Docetaxel in Subjects With Non-small Cell Lung Cancer | mogamulizumab | arm/group Title        | Mogamulizumab + Docetaxel | arm/group Title | arm/group Title                                 | Mogamulizumab + Docetaxel |  |
|                                                                                |               |                        | Affected / at Risk (%)    |                 |                                                 | Affected / at Risk (%)    |  |
|                                                                                |               |                        |                           |                 | Hypoaesthesia                                   | 1/13 (7.69%)              |  |
|                                                                                |               |                        |                           |                 | Headache                                        | 1/13 (7.69%)              |  |
|                                                                                |               |                        |                           |                 | Psychiatric disorders                           |                           |  |
|                                                                                |               |                        |                           |                 | Anxiety                                         | 1/13 (7.69%)              |  |
|                                                                                |               |                        |                           |                 | Mental status change                            | 1/13 (7.69%)              |  |
|                                                                                |               |                        |                           |                 | Insomnia                                        | 1/13 (7.69%)              |  |
|                                                                                |               |                        |                           |                 | Disorientation                                  | 1/13 (7.69%)              |  |
|                                                                                |               |                        |                           |                 | Respiratory, thoracic and mediastinal disorders |                           |  |
|                                                                                |               |                        |                           |                 | Dyspnea                                         | 3/13 (23.08%)             |  |
|                                                                                |               |                        |                           |                 | Paranasal sinus hypersecretion                  | 1/13 (7.69%)              |  |
|                                                                                |               |                        |                           |                 | Cough                                           | 1/13 (7.69%)              |  |
|                                                                                |               |                        |                           |                 | Haemoptysis                                     | 1/13 (7.69%)              |  |
|                                                                                |               |                        |                           |                 | Dyspnea exertional                              | 1/13 (7.69%)              |  |
|                                                                                |               |                        |                           |                 | Hypoxia                                         | 1/13 (7.69%)              |  |
|                                                                                |               |                        |                           |                 | Productive cough                                | 1/13 (7.69%)              |  |
|                                                                                |               |                        |                           |                 | Skin and subcutaneous tissue disorders          |                           |  |
|                                                                                |               |                        |                           |                 | Alopecia                                        | 2/13 (15.38%)             |  |
|                                                                                |               |                        |                           |                 | Rash                                            | 2/13 (15.38%)             |  |
|                                                                                |               |                        |                           |                 | Palmer-plantar erythrodysesthesia syndrome      | 1/13 (7.69%)              |  |
|                                                                                |               |                        |                           |                 | Rash macular                                    | 1/13 (7.69%)              |  |
|                                                                                |               |                        |                           |                 | Rash papular                                    | 1/13 (7.69%)              |  |
|                                                                                |               |                        |                           |                 | Night sweats                                    | 1/13 (7.69%)              |  |

| Study Title                                                                                                                                                                                          | Drug          | Serious Adverse Events               |                           |                 | Other Adverse Events    |                           |  |
|------------------------------------------------------------------------------------------------------------------------------------------------------------------------------------------------------|---------------|--------------------------------------|---------------------------|-----------------|-------------------------|---------------------------|--|
| Study of Mogamulizumab + Docetaxel in Subjects With Non-small Cell Lung Cancer                                                                                                                       | mogamulizumab | arm/group Title                      | Mogamulizumab + Docetaxel | arm/group Title | arm/group Title         | Mogamulizumab + Docetaxel |  |
|                                                                                                                                                                                                      |               |                                      | Affected / at Risk (%)    |                 |                         | Affected / at Risk (%)    |  |
|                                                                                                                                                                                                      |               |                                      |                           |                 | Rash maculopapular      | 1/13 (7.69%)              |  |
|                                                                                                                                                                                                      |               |                                      |                           |                 | Skin exfoliation        | 1/13 (7.69%)              |  |
|                                                                                                                                                                                                      |               |                                      |                           |                 | Vascular disorders      |                           |  |
|                                                                                                                                                                                                      |               |                                      |                           |                 | Orthostatic hypotension | 2/13 (15.38%)             |  |
|                                                                                                                                                                                                      |               |                                      |                           |                 | Hypertension            | 1/13 (7.69%)              |  |
|                                                                                                                                                                                                      |               |                                      |                           |                 | Hypotension             | 1/13 (7.69%)              |  |
|                                                                                                                                                                                                      |               |                                      |                           |                 |                         |                           |  |
| A Study to Evaluate the Efficacy and Safety of Anamorelin HCl for the Treatment of Malignancy Associated Weight Loss and Anorexia in Adult Patients With Advanced Non-Small Cell Lung Cancer (NSCLC) | anamorelin    | Arm/Group Title                      | 100 mg Anamorelin HCl     | Placebo         |                         |                           |  |
|                                                                                                                                                                                                      |               |                                      | Affected / at Risk (%)    | # Events        | Affected / at Risk (%)  | # Events                  |  |
|                                                                                                                                                                                                      |               | Total                                | 43/159 (27.04%)           |                 | 39/159 (24.53%)         |                           |  |
|                                                                                                                                                                                                      |               | Blood and lymphatic system disorders |                           |                 |                         |                           |  |
|                                                                                                                                                                                                      |               | Leukopenia†1                         | 1/159 (0.63%)             | 1               | 0/159 (0.00%)           | 0                         |  |
|                                                                                                                                                                                                      |               | Pancytopenia†1                       | 1/159 (0.63%)             | 1               | 0/159 (0.00%)           | 0                         |  |
|                                                                                                                                                                                                      |               | Anaemia†1                            | 0/159 (0.00%)             | 0               | 1/159 (0.63%)           | 1                         |  |
|                                                                                                                                                                                                      |               | Febrile neutropenia†1                | 0/159 (0.00%)             | 0               | 1/159 (0.63%)           | 1                         |  |
|                                                                                                                                                                                                      |               | Thrombocytopenia†1                   | 0/159 (0.00%)             | 0               | 1/159 (0.63%)           | 1                         |  |
|                                                                                                                                                                                                      |               | Cardiac disorders                    |                           |                 |                         |                           |  |
|                                                                                                                                                                                                      |               | Pericardial effusion†1               | 2/159 (1.26%)             | 2               | 0/159 (0.00%)           | 0                         |  |
|                                                                                                                                                                                                      |               | Acute myocardial infarction†1        | 1/159 (0.63%)             | 1               | 0/159 (0.00%)           | 0                         |  |
|                                                                                                                                                                                                      |               | Atrial flutter†1                     | 1/159 (0.63%)             | 1               | 1/159 (0.63%)           | 1                         |  |
|                                                                                                                                                                                                      |               | Cardiac arrest†1                     | 1/159 (0.63%)             | 1               | 0/159 (0.00%)           | 0                         |  |
|                                                                                                                                                                                                      |               | Cardiac failure†1                    | 1/159 (0.63%)             | 1               | 0/159 (0.00%)           | 0                         |  |
|                                                                                                                                                                                                      |               | Myocardial infarction†1              | 1/159 (0.63%)             | 1               | 0/159 (0.00%)           | 0                         |  |
|                                                                                                                                                                                                      |               | Acute coronary syndrome†1            | 0/159 (0.00%)             | 0               | 1/159 (0.63%)           | 1                         |  |
|                                                                                                                                                                                                      |               | Atrial fibrillation†1                | 0/159 (0.00%)             | 0               | 1/159 (0.63%)           | 1                         |  |
|                                                                                                                                                                                                      |               | Cardiac tamponade†1                  | 0/159 (0.00%)             | 0               | 2/159 (1.26%)           | 2                         |  |

| Study Title                                                                                                                                                                                          | Drug       | Serious Adverse Events                 |                        |          | Other Adverse Events   |          |  |
|------------------------------------------------------------------------------------------------------------------------------------------------------------------------------------------------------|------------|----------------------------------------|------------------------|----------|------------------------|----------|--|
| A Study to Evaluate the Efficacy and Safety of Anamorelin HCl for the Treatment of Malignancy Associated Weight Loss and Anorexia in Adult Patients With Advanced Non-Small Cell Lung Cancer (NSCLC) | anamorelin | Arm/Group Title                        | 100 mg Anamorelin HCl  | Placebo  |                        |          |  |
|                                                                                                                                                                                                      |            |                                        | Affected / at Risk (%) | # Events | Affected / at Risk (%) | # Events |  |
|                                                                                                                                                                                                      |            | Gastrointestinal disorders             |                        |          |                        |          |  |
|                                                                                                                                                                                                      |            | Autoimmune colitis†1                   | 1/159 (0.63%)          | 1        | 0/159 (0.00%)          | 0        |  |
|                                                                                                                                                                                                      |            | Gastric haemorrhage†1                  | 1/159 (0.63%)          | 1        | 0/159 (0.00%)          | 0        |  |
|                                                                                                                                                                                                      |            | Ileus†1                                | 1/159 (0.63%)          | 1        | 0/159 (0.00%)          | 0        |  |
|                                                                                                                                                                                                      |            | Intestinal obstruction†1               | 1/159 (0.63%)          | 1        | 0/159 (0.00%)          | 0        |  |
|                                                                                                                                                                                                      |            | Oesophageal stenosis†1                 | 1/159 (0.63%)          | 1        | 0/159 (0.00%)          | 0        |  |
|                                                                                                                                                                                                      |            | Small intestinal ulcer perforation†1   | 1/159 (0.63%)          | 1        | 0/159 (0.00%)          | 0        |  |
|                                                                                                                                                                                                      |            | Vomiting†1                             | 1/159 (0.63%)          | 1        | 0/159 (0.00%)          | 0        |  |
|                                                                                                                                                                                                      |            | Diverticulum intestinal haemorrhagic†1 | 0/159 (0.00%)          | 0        | 1/159 (0.63%)          | 2        |  |
|                                                                                                                                                                                                      |            | Large intestinal obstruction†1         | 0/159 (0.00%)          | 0        | 1/159 (0.63%)          | 1        |  |
|                                                                                                                                                                                                      |            | General disorders                      |                        |          |                        |          |  |
|                                                                                                                                                                                                      |            | Pain†1                                 | 1/159 (0.63%)          | 1        | 0/159 (0.00%)          | 0        |  |
|                                                                                                                                                                                                      |            | Asthenia†1                             | 0/159 (0.00%)          | 0        | 1/159 (0.63%)          | 1        |  |
|                                                                                                                                                                                                      |            | Oedema peripheral†1                    | 0/159 (0.00%)          | 0        | 1/159 (0.63%)          | 1        |  |
|                                                                                                                                                                                                      |            | Sudden death†1                         | 0/159 (0.00%)          | 0        | 2/159 (1.26%)          | 2        |  |
|                                                                                                                                                                                                      |            | Atrial fibrillation†1                  | 0/159 (0.00%)          | 0        | 1/159 (0.63%)          | 1        |  |
|                                                                                                                                                                                                      |            | Cardiac tamponade†1                    | 0/159 (0.00%)          | 0        | 2/159 (1.26%)          | 2        |  |
|                                                                                                                                                                                                      |            | Hepatobiliary disorders                |                        |          |                        |          |  |
|                                                                                                                                                                                                      |            | Hepatic failure†1                      | 0/159 (0.00%)          | 0        | 1/159 (0.63%)          | 1        |  |
|                                                                                                                                                                                                      |            | Infections and infestations            |                        |          |                        |          |  |
|                                                                                                                                                                                                      |            | Bronchitis†1                           | 2/159 (1.26%)          | 2        | 0/159 (0.00%)          | 0        |  |
|                                                                                                                                                                                                      |            | Peritonitis†1                          | 1/159 (0.63%)          | 1        | 0/159 (0.00%)          | 0        |  |
|                                                                                                                                                                                                      |            | Pneumonia†1                            | 1/159 (0.63%)          | 1        | 1/159 (0.63%)          | 1        |  |
|                                                                                                                                                                                                      |            | Sepsis†1                               | 1/159 (0.63%)          | 1        | 1/159 (0.63%)          | 1        |  |
|                                                                                                                                                                                                      |            | Viral infection†1                      | 1/159 (0.63%)          | 1        | 0/159 (0.00%)          | 0        |  |
|                                                                                                                                                                                                      |            | Empyema†1                              | 0/159 (0.00%)          | 0        | 1/159 (0.63%)          | 1        |  |
|                                                                                                                                                                                                      |            | Gastroenteritis†1                      | 0/159 (0.00%)          | 0        | 1/159 (0.63%)          | 1        |  |
|                                                                                                                                                                                                      |            | Pneumonia viral†1                      | 0/159 (0.00%)          | 0        | 1/159 (0.63%)          | 1        |  |

| Study Title                                                                                                                                                                                          | Drug       | Serious Adverse Events                                              |                        |          | Other Adverse Events   |          |  |
|------------------------------------------------------------------------------------------------------------------------------------------------------------------------------------------------------|------------|---------------------------------------------------------------------|------------------------|----------|------------------------|----------|--|
| A Study to Evaluate the Efficacy and Safety of Anamorelin HCl for the Treatment of Malignancy Associated Weight Loss and Anorexia in Adult Patients With Advanced Non-Small Cell Lung Cancer (NSCLC) | anamorelin | Arm/Group Title                                                     | 100 mg Anamorelin HCl  | Placebo  |                        |          |  |
|                                                                                                                                                                                                      |            |                                                                     | Affected / at Risk (%) | # Events | Affected / at Risk (%) | # Events |  |
|                                                                                                                                                                                                      |            | Respiratory tract infection†1                                       | 0/159 (0.00%)          | 0        | 1/159 (0.63%)          | 1        |  |
|                                                                                                                                                                                                      |            | Injury, poisoning and procedural complications                      |                        |          |                        |          |  |
|                                                                                                                                                                                                      |            | Chemical peritonitis†1                                              | 1/159 (0.63%)          | 1        | 0/159 (0.00%)          | 0        |  |
|                                                                                                                                                                                                      |            | Investigations                                                      |                        |          |                        |          |  |
|                                                                                                                                                                                                      |            | Alanine aminotransferase increased†1                                | 0/159 (0.00%)          | 0        | 1/159 (0.63%)          | 1        |  |
|                                                                                                                                                                                                      |            | Aspartate aminotransferase increased†1                              | 0/159 (0.00%)          | 0        | 1/159 (0.63%)          | 1        |  |
|                                                                                                                                                                                                      |            | Musculoskeletal and connective tissue disorders                     |                        |          |                        |          |  |
|                                                                                                                                                                                                      |            | Arthralgia†1                                                        | 1/159 (0.63%)          | 1        | 0/159 (0.00%)          | 0        |  |
|                                                                                                                                                                                                      |            | Back pain†1                                                         | 1/159 (0.63%)          | 1        | 0/159 (0.00%)          | 0        |  |
|                                                                                                                                                                                                      |            | Osteonecrosis of jaw†1                                              | 1/159 (0.63%)          | 1        | 0/159 (0.00%)          | 0        |  |
|                                                                                                                                                                                                      |            | Neoplasms benign, malignant and unspecified (incl cysts and polyps) |                        |          |                        |          |  |
|                                                                                                                                                                                                      |            | Non-small cell lung cancer†1                                        | 15/159 (9.43%)         | 15       | 16/159 (10.06%)        | 16       |  |
|                                                                                                                                                                                                      |            | Metastases to central nervous system†1                              | 3/159 (1.89%)          | 3        | 1/159 (0.63%)          | 1        |  |
|                                                                                                                                                                                                      |            | Cancer pain†1                                                       | 0/159 (0.00%)          | 0        | 1/159 (0.63%)          | 1        |  |
|                                                                                                                                                                                                      |            | Metastases to liver†1                                               | 0/159 (0.00%)          | 0        | 1/159 (0.63%)          | 1        |  |
|                                                                                                                                                                                                      |            | Nervous system disorders                                            |                        |          |                        |          |  |
|                                                                                                                                                                                                      |            | Cerebrovascular accident†1                                          | 1/159 (0.63%)          | 1        | 1/159 (0.63%)          | 1        |  |
|                                                                                                                                                                                                      |            | Depressed level of consciousness†1                                  | 1/159 (0.63%)          | 1        | 0/159 (0.00%)          | 0        |  |
|                                                                                                                                                                                                      |            | Intracranial pressure increased†1                                   | 1/159 (0.63%)          | 1        | 0/159 (0.00%)          | 0        |  |
|                                                                                                                                                                                                      |            | Ischaemic stroke†1                                                  | 0/159 (0.00%)          | 0        | 1/159 (0.63%)          | 1        |  |
|                                                                                                                                                                                                      |            | Syncope†1                                                           | 0/159 (0.00%)          | 0        | 1/159 (0.63%)          | 1        |  |
|                                                                                                                                                                                                      |            | Renal and urinary disorders                                         |                        |          |                        |          |  |
|                                                                                                                                                                                                      |            | Haematuria†1                                                        | 1/159 (0.63%)          | 1        | 0/159 (0.00%)          | 0        |  |

| Study Title                                                                                                                                                                                          | Drug       | Serious Adverse Events                          |                        |          | Other Adverse Events   |          |  |
|------------------------------------------------------------------------------------------------------------------------------------------------------------------------------------------------------|------------|-------------------------------------------------|------------------------|----------|------------------------|----------|--|
| A Study to Evaluate the Efficacy and Safety of Anamorelin HCl for the Treatment of Malignancy Associated Weight Loss and Anorexia in Adult Patients With Advanced Non-Small Cell Lung Cancer (NSCLC) | anamorelin | Arm/Group Title                                 | 100 mg Anamorelin HCl  | Placebo  |                        |          |  |
|                                                                                                                                                                                                      |            |                                                 | Affected / at Risk (%) | # Events | Affected / at Risk (%) | # Events |  |
|                                                                                                                                                                                                      |            | Hydronephrosis†1                                | 1/159 (0.63%)          | 1        | 0/159 (0.00%)          | 0        |  |
|                                                                                                                                                                                                      |            | Urinary bladder haemorrhage†1                   | 1/159 (0.63%)          | 1        | 0/159 (0.00%)          | 0        |  |
|                                                                                                                                                                                                      |            | Acute kidney injury†1                           | 0/159 (0.00%)          | 0        | 1/159 (0.63%)          | 1        |  |
|                                                                                                                                                                                                      |            | Respiratory, thoracic and mediastinal disorders |                        |          |                        |          |  |
|                                                                                                                                                                                                      |            | Acute respiratory failure†1                     | 2/159 (1.26%)          | 2        | 0/159 (0.00%)          | 0        |  |
|                                                                                                                                                                                                      |            | Pulmonary embolism†1                            | 2/159 (1.26%)          | 2        | 0/159 (0.00%)          | 0        |  |
|                                                                                                                                                                                                      |            | Respiratory failure†1                           | 2/159 (1.26%)          | 2        | 0/159 (0.00%)          | 0        |  |
|                                                                                                                                                                                                      |            | Chronic obstructive pulmonary disease†1         | 1/159 (0.63%)          | 1        | 1/159 (0.63%)          | 2        |  |
|                                                                                                                                                                                                      |            | Hypoxia†1                                       | 1/159 (0.63%)          | 1        | 0/159 (0.00%)          | 0        |  |
|                                                                                                                                                                                                      |            | Dyspnoea†1                                      | 0/159 (0.00%)          | 0        | 3/159 (1.89%)          | 3        |  |
|                                                                                                                                                                                                      |            | Haemoptysis†1                                   | 0/159 (0.00%)          | 0        | 2/159 (1.26%)          | 2        |  |
|                                                                                                                                                                                                      |            | Haemothorax†1                                   | 0/159 (0.00%)          | 0        | 1/159 (0.63%)          | 1        |  |
|                                                                                                                                                                                                      |            |                                                 | Affected / at Risk (%) | # Events | Affected / at Risk (%) | # Events |  |
|                                                                                                                                                                                                      |            | Total                                           | 43/159 (27.04%)        |          | 39/159 (24.53%)        |          |  |
|                                                                                                                                                                                                      |            | Blood and lymphatic system disorders            |                        |          |                        |          |  |
|                                                                                                                                                                                                      |            | Leukopenia†1                                    | 1/159 (0.63%)          | 1        | 0/159 (0.00%)          | 0        |  |
|                                                                                                                                                                                                      |            | Pancytopenia†1                                  | 1/159 (0.63%)          | 1        | 0/159 (0.00%)          | 0        |  |
|                                                                                                                                                                                                      |            | Anaemia†1                                       | 0/159 (0.00%)          | 0        | 1/159 (0.63%)          | 1        |  |
|                                                                                                                                                                                                      |            | Febrile neutropenia†1                           | 0/159 (0.00%)          | 0        | 1/159 (0.63%)          | 1        |  |
|                                                                                                                                                                                                      |            | Thrombocytopenia†1                              | 0/159 (0.00%)          | 0        | 1/159 (0.63%)          | 1        |  |
|                                                                                                                                                                                                      |            | Cardiac disorders                               |                        |          |                        |          |  |
|                                                                                                                                                                                                      |            | Pericardial effusion†1                          | 2/159 (1.26%)          | 2        | 0/159 (0.00%)          | 0        |  |
|                                                                                                                                                                                                      |            | Acute myocardial effusion†1                     | 1/159 (0.63%)          | 1        | 0/159 (0.00%)          | 0        |  |
|                                                                                                                                                                                                      |            | Atrial flutter†1                                | 1/159 (0.63%)          | 1        | 1/159 (0.63%)          | 1        |  |
|                                                                                                                                                                                                      |            | Cardiac arrest†1                                | 1/159 (0.63%)          | 1        | 0/159 (0.00%)          | 0        |  |



| Study Title                                                                                                                                                                                          | Drug       | Serious Adverse Events                 |                        |          | Other Adverse Events   |          |  |
|------------------------------------------------------------------------------------------------------------------------------------------------------------------------------------------------------|------------|----------------------------------------|------------------------|----------|------------------------|----------|--|
| A Study to Evaluate the Efficacy and Safety of Anamorelin HCl for the Treatment of Malignancy Associated Weight Loss and Anorexia in Adult Patients With Advanced Non-Small Cell Lung Cancer (NSCLC) | anamorelin | Arm/Group Title                        | 100 mg Anamorelin HCl  | Placebo  |                        |          |  |
|                                                                                                                                                                                                      |            |                                        | Affected / at Risk (%) | # Events | Affected / at Risk (%) | # Events |  |
|                                                                                                                                                                                                      |            | Cardiac failure†1                      | 1/159 (0.63%)          | 1        | 0/159 (0.00%)          | 0        |  |
|                                                                                                                                                                                                      |            | Myocardial infarction†1                | 1/159 (0.63%)          | 1        | 0/159 (0.00%)          | 0        |  |
|                                                                                                                                                                                                      |            | Acute coronary syndrome†1              | 0/159 (0.00%)          | 0        | 1/159 (0.63%)          | 1        |  |
|                                                                                                                                                                                                      |            | Atrial fibrillation†1                  | 0/159 (0.00%)          | 0        | 1/159 (0.63%)          | 1        |  |
|                                                                                                                                                                                                      |            | Cardiac tamponade†1                    | 0/159 (0.00%)          | 0        | 2/159 (1.26%)          | 2        |  |
|                                                                                                                                                                                                      |            | Gastrointestinal disorders             |                        |          |                        |          |  |
|                                                                                                                                                                                                      |            | Autoimmune colitis†1                   | 1/159 (0.63%)          | 1        | 0/159 (0.00%)          | 0        |  |
|                                                                                                                                                                                                      |            | Gastric haemorrhage†1                  | 1/159 (0.63%)          | 1        | 0/159 (0.00%)          | 0        |  |
|                                                                                                                                                                                                      |            | Ileus†1                                | 1/159 (0.63%)          | 1        | 0/159 (0.00%)          | 0        |  |
|                                                                                                                                                                                                      |            | Intestinal obstruction†1               | 1/159 (0.63%)          | 1        | 0/159 (0.00%)          | 0        |  |
|                                                                                                                                                                                                      |            | Oesophageal stenosis†1                 | 1/159 (0.63%)          | 1        | 0/159 (0.00%)          | 0        |  |
|                                                                                                                                                                                                      |            | Small intestinal ulcer perforation†1   | 1/159 (0.63%)          | 1        | 0/159 (0.00%)          | 0        |  |
|                                                                                                                                                                                                      |            | Vomiting†1                             | 1/159 (0.63%)          | 1        | 0/159 (0.00%)          | 0        |  |
|                                                                                                                                                                                                      |            | Diverticulum intestinal haemorrhagic†1 | 0/159 (0.00%)          | 0        | 1/159 (0.63%)          | 2        |  |
|                                                                                                                                                                                                      |            | Large intestinal obstruction†1         | 0/159 (0.00%)          | 0        | 1/159 (0.63%)          | 1        |  |
|                                                                                                                                                                                                      |            | General disorders                      |                        |          |                        |          |  |
|                                                                                                                                                                                                      |            | Pain†1                                 | 1/159 (0.63%)          | 1        | 0/159 (0.00%)          | 0        |  |
|                                                                                                                                                                                                      |            | Asthenia†1                             | 0/159 (0.00%)          | 0        | 1/159 (0.63%)          | 1        |  |
|                                                                                                                                                                                                      |            | Oedema peripheral†1                    | 0/159 (0.00%)          | 0        | 1/159 (0.63%)          | 1        |  |
|                                                                                                                                                                                                      |            | Sudden death†1                         | 0/159 (0.00%)          | 0        | 2/159 (1.26%)          | 2        |  |
|                                                                                                                                                                                                      |            | Hepatobiliary disorders                |                        |          |                        |          |  |
|                                                                                                                                                                                                      |            | Hepatic failure†1                      | 0/159 (0.00%)          | 0        | 1/159 (0.63%)          | 1        |  |
|                                                                                                                                                                                                      |            | Infections and infestations            |                        |          |                        |          |  |
|                                                                                                                                                                                                      |            | Bronchitis†1                           | 2/159 (1.26%)          | 2        | 0/159 (0.00%)          | 0        |  |
|                                                                                                                                                                                                      |            | Peritonitis†1                          | 1/159 (0.63%)          | 1        | 0/159 (0.00%)          | 0        |  |
|                                                                                                                                                                                                      |            | Pneumonia†1                            | 1/159 (0.63%)          | 1        | 1/159 (0.63%)          | 1        |  |
|                                                                                                                                                                                                      |            | Sepsis†1                               | 1/159 (0.63%)          | 1        | 1/159 (0.63%)          | 1        |  |
|                                                                                                                                                                                                      |            | Viral infection†1                      | 1/159 (0.63%)          | 1        | 0/159 (0.00%)          | 0        |  |

| Study Title                                                                                                                                                                                          | Drug       | Serious Adverse Events                                              |                        |          | Other Adverse Events   |          |  |
|------------------------------------------------------------------------------------------------------------------------------------------------------------------------------------------------------|------------|---------------------------------------------------------------------|------------------------|----------|------------------------|----------|--|
| A Study to Evaluate the Efficacy and Safety of Anamorelin HCl for the Treatment of Malignancy Associated Weight Loss and Anorexia in Adult Patients With Advanced Non-Small Cell Lung Cancer (NSCLC) | anamorelin | Arm/Group Title                                                     | 100 mg Anamorelin HCl  | Placebo  |                        |          |  |
|                                                                                                                                                                                                      |            |                                                                     | Affected / at Risk (%) | # Events | Affected / at Risk (%) | # Events |  |
|                                                                                                                                                                                                      |            | Empyema†1                                                           | 0/159 (0.00%)          | 0        | 1/159 (0.63%)          | 1        |  |
|                                                                                                                                                                                                      |            | Gastroenteritis†1                                                   | 0/159 (0.00%)          | 0        | 1/159 (0.63%)          | 1        |  |
|                                                                                                                                                                                                      |            | Pneumonia viral†1                                                   | 0/159 (0.00%)          | 0        | 1/159 (0.63%)          | 1        |  |
|                                                                                                                                                                                                      |            | Respiratory tract infection†1                                       | 0/159 (0.00%)          | 0        | 1/159 (0.63%)          | 1        |  |
|                                                                                                                                                                                                      |            | Injury, poisoning and procedural complications                      |                        |          |                        |          |  |
|                                                                                                                                                                                                      |            | Chemical peritonitis†1                                              | 1/159 (0.63%)          | 1        | 0/159 (0.00%)          | 0        |  |
|                                                                                                                                                                                                      |            | Investigations                                                      |                        |          |                        |          |  |
|                                                                                                                                                                                                      |            | Alanine aminotransferase increased†1                                | 0/159 (0.00%)          | 0        | 1/159 (0.63%)          | 1        |  |
|                                                                                                                                                                                                      |            | Aspartate aminotransferase increased†1                              | 0/159 (0.00%)          | 0        | 1/159 (0.63%)          | 1        |  |
|                                                                                                                                                                                                      |            | Musculoskeletal and connective tissue disorders                     |                        |          |                        |          |  |
|                                                                                                                                                                                                      |            | Arthralgia†1                                                        | 1/159 (0.63%)          | 1        | 0/159 (0.00%)          | 0        |  |
|                                                                                                                                                                                                      |            | Back pain†1                                                         | 1/159 (0.63%)          | 1        | 0/159 (0.00%)          | 0        |  |
|                                                                                                                                                                                                      |            | Osteonecrosis of jaw†1                                              | 1/159 (0.63%)          | 1        | 0/159 (0.00%)          | 0        |  |
|                                                                                                                                                                                                      |            | Neoplasms benign, malignant and unspecified (incl cysts and polyps) |                        |          |                        |          |  |
|                                                                                                                                                                                                      |            | Non-small cell lung cancer†1                                        | 15/159 (9.43%)         | 15       | 16/159 (10.06%)        | 16       |  |
|                                                                                                                                                                                                      |            | Metastases to central nervous system†1                              | 3/159 (1.89%)          | 3        | 1/159 (0.63%)          | 1        |  |
|                                                                                                                                                                                                      |            | Cancer pain†1                                                       | 0/159 (0.00%)          | 0        | 1/159 (0.63%)          | 1        |  |
|                                                                                                                                                                                                      |            | Metastases to liver†1                                               | 0/159 (0.00%)          | 0        | 1/159 (0.63%)          | 1        |  |
|                                                                                                                                                                                                      |            | Nervous system disorders                                            |                        |          |                        |          |  |
|                                                                                                                                                                                                      |            | Cerebrovascular accident†1                                          | 1/159 (0.63%)          | 1        | 1/159 (0.63%)          | 1        |  |
|                                                                                                                                                                                                      |            | Depressed level of consciousness†1                                  | 1/159 (0.63%)          | 1        | 0/159 (0.00%)          | 0        |  |
|                                                                                                                                                                                                      |            | Intracranial pressure increased†1                                   | 1/159 (0.63%)          | 1        | 0/159 (0.00%)          | 0        |  |
|                                                                                                                                                                                                      |            | Ischaemic stroke†1                                                  | 0/159 (0.00%)          | 0        | 1/159 (0.63%)          | 1        |  |
|                                                                                                                                                                                                      |            | Syncope†1                                                           | 0/159 (0.00%)          | 0        | 1/159 (0.63%)          | 1        |  |

| Study Title                                                                                                                                                                                          | Drug       | Serious Adverse Events                          |                        |          | Other Adverse Events   |          |  |
|------------------------------------------------------------------------------------------------------------------------------------------------------------------------------------------------------|------------|-------------------------------------------------|------------------------|----------|------------------------|----------|--|
| A Study to Evaluate the Efficacy and Safety of Anamorelin HCl for the Treatment of Malignancy Associated Weight Loss and Anorexia in Adult Patients With Advanced Non-Small Cell Lung Cancer (NSCLC) | anamorelin | Arm/Group Title                                 | 100 mg Anamorelin HCl  | Placebo  |                        |          |  |
|                                                                                                                                                                                                      |            |                                                 | Affected / at Risk (%) | # Events | Affected / at Risk (%) | # Events |  |
|                                                                                                                                                                                                      |            | Renal and urinary disorders                     |                        |          |                        |          |  |
|                                                                                                                                                                                                      |            | Haematuria†1                                    | 1/159 (0.63%)          | 1        | 0/159 (0.00%)          | 0        |  |
|                                                                                                                                                                                                      |            | Hydronephrosis†1                                | 1/159 (0.63%)          | 1        | 0/159 (0.00%)          | 0        |  |
|                                                                                                                                                                                                      |            | Urinary bladder haemorrhage†1                   | 1/159 (0.63%)          | 1        | 0/159 (0.00%)          | 0        |  |
|                                                                                                                                                                                                      |            | Acute kidney injury†1                           | 0/159 (0.00%)          | 0        | 1/159 (0.63%)          | 1        |  |
|                                                                                                                                                                                                      |            | Respiratory, thoracic and mediastinal disorders |                        |          |                        |          |  |
|                                                                                                                                                                                                      |            | Acute respiratory failure†1                     | 2/159 (1.26%)          | 2        | 0/159 (0.00%)          | 0        |  |
|                                                                                                                                                                                                      |            | Pulmonary embolism†1                            | 2/159 (1.26%)          | 2        | 0/159 (0.00%)          | 0        |  |
|                                                                                                                                                                                                      |            | Respiratory failure†1                           | 2/159 (1.26%)          | 2        | 0/159 (0.00%)          | 0        |  |
|                                                                                                                                                                                                      |            | Chronic obstructive pulmonary disease†1         | 1/159 (0.63%)          | 1        | 1/159 (0.63%)          | 2        |  |
|                                                                                                                                                                                                      |            | Hypoxia†1                                       | 1/159 (0.63%)          | 1        | 0/159 (0.00%)          | 0        |  |
|                                                                                                                                                                                                      |            | Dyspnoea†1                                      | 0/159 (0.00%)          | 0        | 3/159 (1.89%)          | 3        |  |
|                                                                                                                                                                                                      |            | Haemoptysis†1                                   | 0/159 (0.00%)          | 0        | 2/159 (1.26%)          | 2        |  |
|                                                                                                                                                                                                      |            | Haemothorax†1                                   | 0/159 (0.00%)          | 0        | 1/159 (0.63%)          | 1        |  |
|                                                                                                                                                                                                      |            | Arm/Group Title                                 | 100 mg Anamorelin HCl  | Placebo  |                        |          |  |
|                                                                                                                                                                                                      |            |                                                 | Affected / at Risk (%) | # Events | Affected / at Risk (%) | # Events |  |
|                                                                                                                                                                                                      |            | Total                                           | 82/159 (51.57%)        |          | 87/159 (54.72%)        |          |  |
|                                                                                                                                                                                                      |            | Blood and lymphatic system disorders            |                        |          |                        |          |  |
|                                                                                                                                                                                                      |            | Anaemia†1                                       | 14/159 (8.81%)         | 17       | 19/159 (11.95%)        | 24       |  |
|                                                                                                                                                                                                      |            | Leukopenia†1                                    | 4/159 (2.52%)          | 4        | 1/159 (0.63%)          | 1        |  |
|                                                                                                                                                                                                      |            | Neutropenia†1                                   | 2/159 (1.26%)          | 5        | 4/159 (2.52%)          | 5        |  |
|                                                                                                                                                                                                      |            | Thrombocytopenia†1                              | 2/159 (1.26%)          | 4        | 5/159 (3.14%)          | 5        |  |
|                                                                                                                                                                                                      |            | Gastrointestinal disorders                      |                        |          |                        |          |  |
|                                                                                                                                                                                                      |            | Nausea†1                                        | 9/159 (5.66%)          | 9        | 7/159 (4.40%)          | 7        |  |
|                                                                                                                                                                                                      |            | Diarrhoea†1                                     | 4/159 (2.52%)          | 5        | 5/159 (3.14%)          | 5        |  |

| Study Title                                                                                                                                                                                          | Drug       | Serious Adverse Events                                     |                        |          | Other Adverse Events   |          |  |
|------------------------------------------------------------------------------------------------------------------------------------------------------------------------------------------------------|------------|------------------------------------------------------------|------------------------|----------|------------------------|----------|--|
| A Study to Evaluate the Efficacy and Safety of Anamorelin HCl for the Treatment of Malignancy Associated Weight Loss and Anorexia in Adult Patients With Advanced Non-Small Cell Lung Cancer (NSCLC) | anamorelin | Arm/Group Title                                            | 100 mg Anamorelin HCl  | Placebo  |                        |          |  |
|                                                                                                                                                                                                      |            |                                                            | Affected / at Risk (%) | # Events | Affected / at Risk (%) | # Events |  |
|                                                                                                                                                                                                      |            | Vomiting†1                                                 | 3/159 (1.89%)          | 4        | 7/159 (4.40%)          | 10       |  |
|                                                                                                                                                                                                      |            | General disorders                                          |                        |          |                        |          |  |
|                                                                                                                                                                                                      |            | Asthenia†1                                                 | 8/159 (5.03%)          | 9        | 4/159 (2.52%)          | 5        |  |
|                                                                                                                                                                                                      |            | Fatigue†1                                                  | 6/159 (3.77%)          | 6        | 11/159 (6.92%)         | 13       |  |
|                                                                                                                                                                                                      |            | Oedema Peripheral†1                                        | 6/159 (3.77%)          | 9        | 6/159 (3.77%)          | 11       |  |
|                                                                                                                                                                                                      |            | Chest Pain†1                                               | 2/159 (1.26%)          | 2        | 7/159 (4.40%)          | 7        |  |
|                                                                                                                                                                                                      |            | Pyrexia†1                                                  | 2/159 (1.26%)          | 2        | 4/159 (2.52%)          | 4        |  |
|                                                                                                                                                                                                      |            | Infections and infestations                                |                        |          |                        |          |  |
|                                                                                                                                                                                                      |            | Corona Virus Infection†1                                   | 0/159 (0.00%)          | 0        | 4/159 (2.52%)          | 4        |  |
|                                                                                                                                                                                                      |            | Investigations                                             |                        |          |                        |          |  |
|                                                                                                                                                                                                      |            | Platelet Count Decreased†1                                 | 4/159 (2.52%)          | 4        | 4/159 (2.52%)          | 4        |  |
|                                                                                                                                                                                                      |            | Metabolism and nutrition disorders                         |                        |          |                        |          |  |
|                                                                                                                                                                                                      |            | Hyperkalaemia†1                                            | 6/159 (3.77%)          | 7        | 2/159 (1.26%)          | 2        |  |
|                                                                                                                                                                                                      |            | Decreased Appetite†1                                       | 5/159 (3.14%)          | 6        | 4/159 (2.52%)          | 4        |  |
|                                                                                                                                                                                                      |            | Hypocalcaemia †1                                           | 5/159 (3.14%)          | 5        | 1/159 (0.63%)          | 1        |  |
|                                                                                                                                                                                                      |            | Nervous system disorders                                   |                        |          |                        |          |  |
|                                                                                                                                                                                                      |            | Headache†1                                                 | 4/159 (2.52%)          | 4        | 3/159 (1.89%)          | 4        |  |
|                                                                                                                                                                                                      |            | Respiratory, thoracic and mediastinal disorders            |                        |          |                        |          |  |
|                                                                                                                                                                                                      |            | Dyspnoea†1                                                 | 6/159 (3.77%)          | 6        | 7/159 (4.40%)          | 8        |  |
|                                                                                                                                                                                                      |            | Cough†1                                                    | 0/159 (0.00%)          | 0        | 4/159 (2.52%)          | 4        |  |
|                                                                                                                                                                                                      |            | Pleural Effusion†1                                         | 0/159 (0.00%)          | 0        | 4/159 (2.52%)          | 4        |  |
|                                                                                                                                                                                                      |            | † Indicates events were collected by systematic assessment |                        |          |                        |          |  |
|                                                                                                                                                                                                      |            | 1 Term from vocabulary, MedDRA version 22.0                |                        |          |                        |          |  |
|                                                                                                                                                                                                      |            | Arm/Group Title                                            | Anamorelin HCl         | Placebo  |                        |          |  |
|                                                                                                                                                                                                      |            |                                                            | Affected / at Risk (%) | # Events | Affected / at Risk (%) | # Events |  |
|                                                                                                                                                                                                      |            | Total                                                      | 182/320 (56.88%)       |          | 84/161 (52.17%)        |          |  |
|                                                                                                                                                                                                      |            | Blood and lymphatic system disorders                       |                        |          |                        |          |  |

| Study Title                                                                                                                                                                                          | Drug       | Serious Adverse Events                                     |                        |          | Other Adverse Events   |          |  |
|------------------------------------------------------------------------------------------------------------------------------------------------------------------------------------------------------|------------|------------------------------------------------------------|------------------------|----------|------------------------|----------|--|
| A Study to Evaluate the Efficacy and Safety of Anamorelin HCl for the Treatment of Malignancy Associated Weight Loss and Anorexia in Adult Patients With Advanced Non-Small Cell Lung Cancer (NSCLC) | anamorelin | Arm/Group Title                                            | 100 mg Anamorelin HCl  | Placebo  |                        |          |  |
|                                                                                                                                                                                                      |            |                                                            | Affected / at Risk (%) | # Events | Affected / at Risk (%) | # Events |  |
|                                                                                                                                                                                                      |            | Anaemia†1                                                  | 119/320 (37.19%)       | 179      | 66/161 (40.99%)        | 114      |  |
|                                                                                                                                                                                                      |            | Leukopenia†1                                               | 16/320 (5.00%)         | 17       | 10/161 (6.21%)         | 10       |  |
|                                                                                                                                                                                                      |            | Neutropenia†1                                              | 28/320 (8.75%)         | 34       | 22/161 (13.66%)        | 34       |  |
|                                                                                                                                                                                                      |            | Thrombocytopenia†1                                         | 29/320 (9.06%)         | 42       | 23/161 (14.29%)        | 34       |  |
|                                                                                                                                                                                                      |            | Gastrointestinal disorders                                 |                        |          |                        |          |  |
|                                                                                                                                                                                                      |            | Diarrhoea†1                                                | 17/320 (5.31%)         | 21       | 9/161 (5.59%)          | 9        |  |
|                                                                                                                                                                                                      |            | Nausea†1                                                   | 29/320 (9.06%)         | 44       | 15/161 (9.32%)         | 21       |  |
|                                                                                                                                                                                                      |            | Vomiting†1                                                 | 25/320 (7.81%)         | 27       | 8/161 (4.97%)          | 8        |  |
|                                                                                                                                                                                                      |            | General disorders                                          |                        |          |                        |          |  |
|                                                                                                                                                                                                      |            | Asthenia†1                                                 | 19/320 (5.94%)         | 23       | 9/161 (5.59%)          | 10       |  |
|                                                                                                                                                                                                      |            | Fatigue†1                                                  | 25/320 (7.81%)         | 28       | 13/161 (8.07%)         | 15       |  |
|                                                                                                                                                                                                      |            | Pyrexia†1                                                  | 15/320 (4.69%)         | 16       | 1/161 (0.62%)          | 1        |  |
|                                                                                                                                                                                                      |            | Investigations                                             |                        |          |                        |          |  |
|                                                                                                                                                                                                      |            | Alanine aminotransferase increased†1                       | 50/320 (15.63%)        | 78       | 14/161 (8.70%)         | 20       |  |
|                                                                                                                                                                                                      |            | Aspartate aminotransferase increased†1                     | 37/320 (11.56%)        | 52       | 15/161 (9.32%)         | 21       |  |
|                                                                                                                                                                                                      |            | Blood alkaline phosphatase increased†1                     | 34/320 (10.63%)        | 40       | 10/161 (6.21%)         | 14       |  |
|                                                                                                                                                                                                      |            | Platelet count decreased†1                                 | 14/320 (4.38%)         | 30       | 10/161 (6.21%)         | 16       |  |
|                                                                                                                                                                                                      |            | Metabolism and nutrition disorders                         |                        |          |                        |          |  |
|                                                                                                                                                                                                      |            | Decreased appetite†1                                       | 13/320 (4.06%)         | 15       | 8/161 (4.97%)          | 8        |  |
|                                                                                                                                                                                                      |            | Hyperglycaemia†1                                           | 35/320 (10.94%)        | 41       | 10/161 (6.21%)         | 11       |  |
|                                                                                                                                                                                                      |            | Respiratory, thoracic and mediastinal disorders            |                        |          |                        |          |  |
|                                                                                                                                                                                                      |            | Cough†1                                                    | 14/320 (4.38%)         | 14       | 8/161 (4.97%)          | 9        |  |
|                                                                                                                                                                                                      |            | Dyspnoea†1                                                 | 19/320 (5.94%)         | 24       | 11/161 (6.83%)         | 13       |  |
|                                                                                                                                                                                                      |            | † Indicates events were collected by systematic assessment |                        |          |                        |          |  |
|                                                                                                                                                                                                      |            | 1 Term from vocabulary, MedDRA 14.0                        |                        |          |                        |          |  |
|                                                                                                                                                                                                      |            | 、                                                          |                        |          |                        |          |  |

| Study Title                                                                                                                                                                                          | Drug       | Serious Adverse Events                                    |                        |          | Other Adverse Events   |          |  |
|------------------------------------------------------------------------------------------------------------------------------------------------------------------------------------------------------|------------|-----------------------------------------------------------|------------------------|----------|------------------------|----------|--|
| A Study to Evaluate the Efficacy and Safety of Anamorelin HCl for the Treatment of Malignancy Associated Weight Loss and Anorexia in Adult Patients With Advanced Non-Small Cell Lung Cancer (NSCLC) | anamorelin | Arm/Group Title                                           | 100 mg Anamorelin HCl  | Placebo  |                        |          |  |
|                                                                                                                                                                                                      |            |                                                           | Affected / at Risk (%) | # Events | Affected / at Risk (%) | # Events |  |
|                                                                                                                                                                                                      |            | Arm/Group Title                                           | Anamorelin HCl         | Placebo  |                        |          |  |
|                                                                                                                                                                                                      |            |                                                           | Affected / at Risk (%) | # Events | Affected / at Risk (%) | # Events |  |
|                                                                                                                                                                                                      |            | Total                                                     | 156/330 (47.27%)       |          | 72/161 (44.72%)        |          |  |
|                                                                                                                                                                                                      |            | Blood and lymphatic system disorders                      |                        |          |                        |          |  |
|                                                                                                                                                                                                      |            | Anaemia†1                                                 | 48/330 (14.55%)        | 61       | 21/161 (13.04%)        | 28       |  |
|                                                                                                                                                                                                      |            | Leukopenia†1                                              | 25/330 (7.58%)         | 29       | 6/161 (3.73%)          | 7        |  |
|                                                                                                                                                                                                      |            | Neutropenia†1                                             | 31/330 (9.39%)         | 48       | 10/161 (6.21%)         | 14       |  |
|                                                                                                                                                                                                      |            | Gastrointestinal disorders                                |                        |          |                        |          |  |
|                                                                                                                                                                                                      |            | Nausea†1                                                  | 19/330 (5.76%)         | 20       | 13/161 (8.07%)         | 13       |  |
|                                                                                                                                                                                                      |            | Vomiting†1                                                | 9/330 (2.73%)          | 11       | 9/161 (5.59%)          | 12       |  |
|                                                                                                                                                                                                      |            | General disorders                                         |                        |          |                        |          |  |
|                                                                                                                                                                                                      |            | Asthenia†1                                                | 29/330 (8.79%)         | 30       | 16/161 (9.94%)         | 19       |  |
|                                                                                                                                                                                                      |            | Metabolism and nutrition disorders                        |                        |          |                        |          |  |
|                                                                                                                                                                                                      |            | Hyperglycaemia †1                                         | 23/330 (6.97%)         | 32       | 3/161 (1.86%)          | 3        |  |
|                                                                                                                                                                                                      |            | Skin and subcutaneous tissue disorders                    |                        |          |                        |          |  |
|                                                                                                                                                                                                      |            | Alopecia†1                                                | 29/330 (8.79%)         | 35       | 14/161 (8.70%)         | 15       |  |
|                                                                                                                                                                                                      |            | †Indicates events were collected by systematic assessment |                        |          |                        |          |  |
|                                                                                                                                                                                                      |            | 1                                                         |                        |          |                        |          |  |
|                                                                                                                                                                                                      |            | Term from vocabulary, MedDRA 14.0                         |                        |          |                        |          |  |
|                                                                                                                                                                                                      |            | Arm/Group Title                                           | Anamorelin HCl         | Placebo  |                        |          |  |
|                                                                                                                                                                                                      |            |                                                           | Affected / at Risk (%) | # Events | Affected / at Risk (%) | # Events |  |
|                                                                                                                                                                                                      |            | Total                                                     | 94/343 (27.41%)        |          | 57/167 (34.13%)        |          |  |
|                                                                                                                                                                                                      |            | Blood and lymphatic system disorders                      |                        |          |                        |          |  |
|                                                                                                                                                                                                      |            | Anaemia†1                                                 | 45/343 (13.12%)        | 56       | 25/167 (14.97%)        | 37       |  |
|                                                                                                                                                                                                      |            | Neutropenia†1                                             | 18/343 (5.25%)         | 21       | 8/167 (4.79%)          | 8        |  |
|                                                                                                                                                                                                      |            | General disorders                                         |                        |          |                        |          |  |
|                                                                                                                                                                                                      |            | Asthenia†1                                                | 19/343 (5.54%)         | 20       | 14/167 (8.38%)         | 14       |  |
|                                                                                                                                                                                                      |            | Metabolism and nutrition disorders                        |                        |          |                        |          |  |

| Study Title                                                                                                                                                                                          | Drug       | Serious Adverse Events                                     |                        |          | Other Adverse Events   |          |  |
|------------------------------------------------------------------------------------------------------------------------------------------------------------------------------------------------------|------------|------------------------------------------------------------|------------------------|----------|------------------------|----------|--|
| A Study to Evaluate the Efficacy and Safety of Anamorelin HCl for the Treatment of Malignancy Associated Weight Loss and Anorexia in Adult Patients With Advanced Non-Small Cell Lung Cancer (NSCLC) | anamorelin | Arm/Group Title                                            | 100 mg Anamorelin HCl  | Placebo  |                        |          |  |
|                                                                                                                                                                                                      |            |                                                            | Affected / at Risk (%) | # Events | Affected / at Risk (%) | # Events |  |
|                                                                                                                                                                                                      |            | Decreased appetite†1                                       | 12/343 (3.50%)         | 13       | 10/167 (5.99%)         | 10       |  |
|                                                                                                                                                                                                      |            | † Indicates events were collected by systematic assessment |                        |          |                        |          |  |
|                                                                                                                                                                                                      |            | 1 Term from vocabulary, MedDRA Version 14.0                |                        |          |                        |          |  |

### References

- [1] E. Lee, J.J. Hong, G. Samcam Vargas, N. Sauerwald, Y. Wei, X. Hang, C.L. Theesfeld, J.A.A. Volmar, J.M. Miller, W. Wang, S. Wang, G. Laevsky, C.J. DeCoste, Y. Kang, CXCR4(+) mammary gland macrophageal niche promotes tumor initiating cell activity and immune suppression during tumorigenesis, *Nature communications*, 16 (2025) 4854.
- [2] K.F. Byrne, A. Pal, J.F. Curtin, J.C. Stephens, G.K. Kinsella, G-protein-coupled receptors as therapeutic targets for glioblastoma, *Drug discovery today*, 26 (2021) 2858-2870.
- [3] Y.J. Lee, E. Jung, J. Choi, J.S. Hwang, E.J. Jeong, Y. Roh, H.S. Ban, S. Kim, S.K. Kim, S.Y. Kim, J.K. Min, T.S. Han, J.S. Kim, The EDN1/EDNRA/ $\beta$ -arrestin axis promotes colorectal cancer progression by regulating STAT3 phosphorylation, *International journal of oncology*, 62 (2023).
- [4] K. Han, Z. He, Y. Liu, H. Chen, Identification of EDNRA as the Key Biomarker for Hypercholesterolemia and Colorectal Cancer, *The Tohoku journal of experimental medicine*, 262 (2024) 181-189.
- [5] S. Punyawatthanakool, R. Matsuura, T. Wongchang, N. Katsurada, T. Tsuruyama, M. Tajima, Y. Enomoto, T. Kitamura, M. Kawashima, M. Toi, K. Yamanoi, J. Hamanishi, S. Hisamori, K. Obama, V. Charoensawan, D. Thumkeo, S. Narumiya, Prostaglandin E(2)-EP2/EP4 signaling induces immunosuppression in human cancer by impairing bioenergetics and ribosome biogenesis in immune cells, *Nature communications*, 15 (2024) 9464.
- [6] V.Y. Shin, M.X. Liu, J.M. Siu, A. Kwong, K.M. Chu, Inhibition of EP2 receptor suppresses tumor growth and chemoresistance of gastric cancer, *American journal of cancer research*, 12 (2022) 4680-4692.
- [7] Y. Li, A. Liu, S. Liu, L. Yan, Y. Yuan, Q. Xu, Involvement of CXCL17 and GPR35 in Gastric Cancer Initiation and Progression, *International journal of molecular sciences*, 24 (2022).
- [8] Y.J. Guo, Y.J. Zhou, X.L. Yang, Z.M. Shao, Z.L. Ou, The role and clinical significance of the CXCL17-CXCR8 (GPR35) axis in breast cancer, *Biochemical and biophysical research communications*, 493 (2017) 1159-1167.
- [9] E. Pagano, J.E. Elias, G. Schneditz, S. Saveljeva, L.M. Holland, F. Borrelli, T.H. Karlsen, A. Kaser, N.C. Kaneider, Activation of the GPR35 pathway drives angiogenesis in the tumour microenvironment, *Gut*, 71 (2022) 509-520.
- [10] W. Wang, T. Han, W. Tong, J. Zhao, X. Qiu, Overexpression of GPR35 confers drug resistance

in NSCLC cells by  $\beta$ -arrestin/Akt signaling, *OncoTargets and therapy*, 11 (2018) 6249-6257.

[11] D. Leyva-Illades, S. Demorrow, Orphan G protein receptor GPR55 as an emerging target in cancer therapy and management, *Cancer management and research*, 5 (2013) 147-155.

[12] C. Zhu, Z. Sun, J. Wang, X. Meng, Z. Ma, R. Guo, J. Niu, L.J. Tran, J. Zhang, T. Jiang, Y. Liu, F. Ye, B. Ma, Exploring oncogenes for renal clear cell carcinoma based on G protein-coupled receptor-associated genes, *Discover oncology*, 14 (2023) 182.

[13] L. Perren, M. Busch, P.A. Ruiz, E. Malagola, V. Baumeler, F. Foti, A. Gross, T. Grütter, H. Edel, C. Schuler, K. Handler, G. De Lange, I.C. Arnold, C. de Vallière, K. Seuwen, M. Hausmann, G. Rogler, Loss of proton-sensing GPR4 reduces tumor progression in mouse models of colon cancer, *Molecular oncology*, 19 (2025) 2196-2211.

[14] Y. Fu, S. Liu, R.M. Rodrigues, Y. Han, C. Guo, Z. Zhu, Y. He, B. Mackowiak, D. Feng, B. Gao, S. Zeng, H. Shen, Activation of VIPR1 suppresses hepatocellular carcinoma progression by regulating arginine and pyrimidine metabolism, *International journal of biological sciences*, 18 (2022) 4341-4356.

[15] T.W. Moody, J. Walters, M. Casibang, F. Zia, Y. Gozes, VPAC1 receptors and lung cancer, *Annals of the New York Academy of Sciences*, 921 (2000) 26-32.

[16] J. Wangari-Talbot, B.A. Wall, J.S. Goydos, S. Chen, Functional effects of GRM1 suppression in human melanoma cells, *Molecular cancer research : MCR*, 10 (2012) 1440-1450.

[17] R.E. Sexton, A.H. Hachem, A.A. Assi, M.A. Bukhsh, D.H. Gorski, C.L. Speyer, Metabotropic glutamate receptor-1 regulates inflammation in triple negative breast cancer, *Scientific reports*, 8 (2018) 16008.

[18] L. Yang, G. Chen, S. Mohanty, G. Scott, F. Fazal, A. Rahman, S. Begum, R.O. Hynes, L. Xu, GPR56 Regulates VEGF production and angiogenesis during melanoma progression, *Cancer research*, 71 (2011) 5558-5568.

[19] L. Xu, S. Begum, J.D. Hearn, R.O. Hynes, GPR56, an atypical G protein-coupled receptor, binds tissue transglutaminase, TG2, and inhibits melanoma tumor growth and metastasis, *Proceedings of the National Academy of Sciences of the United States of America*, 103 (2006) 9023-9028.

[20] A.E. Cherry, J.J. Vicente, C. Xu, R.S. Morrison, S.E. Ong, L. Wordeman, N. Stella, GPR124 regulates microtubule assembly, mitotic progression, and glioblastoma cell proliferation, *Glia*, 67 (2019) 1558-1570.

[21] D. Pan, A. Kumar, J.J. Lipof, A. Chung, J.L. Wolf, T.G. Martin, 3rd, S. Arora, P.H. Sayre, A. Chari, Emerging GPRC5D-Targeted therapies for multiple myeloma: a comprehensive review, *Expert opinion on investigational drugs*, 34 (2025) 379-389.

[22] K.C. Miller, I. Hamadeh, C.R. Tan, Perspectives on Talquetamab and its Utility in the Treatment of Multiple Myeloma: Safety, Efficacy and Place in Therapy, *Cancer management and research*, 17 (2025) 743-756.

[23] B. Bockorny, V. Semenisty, T. Macarulla, E. Borazanci, B.M. Wolpin, S.M. Stemmer, T. Golan, R. Geva, M.J. Borad, K.S. Pedersen, J.O. Park, R.A. Ramirez, D.G. Abad, J. Feliu, A. Muñoz, M. Ponz-Sarvisé, A. Peled, T.M. Lustig, O. Bohana-Kashtan, S.M. Shaw, E. Sorani, M. Chaney, S. Kadosh, A. Vainstein Haras, D.D. Von Hoff, M. Hidalgo, BL-8040, a CXCR4 antagonist, in combination with pembrolizumab and chemotherapy for pancreatic cancer: the COMBAT trial, *Nature medicine*, 26 (2020) 878-885.

[24] A.G. Raufi, I. Pellicciotta, C.F. Palermo, S.A. Sastra, A. Chen, E. Alouani, H.C. Maurer, M. May, A. Iuga, R. Rabadan, K.P. Olive, G.A. Manji, Cytotoxic chemotherapy potentiates the immune response



and efficacy of combination CXCR4/PD-1 inhibition in models of pancreatic ductal adenocarcinoma, *bioRxiv : the preprint server for biology*, (2023).

[25] C. Molczyk, R. Sturgeon, S. Saxena, E. Johnsson, R. Bhatia, N. Bhyrabhatla, S. Kumar, S.K. Batra, R.K. Singh, Unlocking the Power of CXCR2 Inhibition to Overcome Gemcitabine Resistance in Pancreatic Cancer, *bioRxiv : the preprint server for biology*, (2025).

[26] R.J. Cherney, P. Anjanappa, K. Selvakumar, D.G. Batt, G.D. Brown, A.V. Rose, R. Vuppugalla, J. Chen, J. Pang, S. Xu, M. Yarde, A.J. Tebben, V.R. Paidi, M.E. Cvijic, A. Mathur, J.C. Barrish, S. Mandlekar, Q. Zhao, P.H. Carter, BMS-813160: A Potent CCR2 and CCR5 Dual Antagonist Selected as a Clinical Candidate, *ACS medicinal chemistry letters*, 12 (2021) 1753-1758.

[27] M.M. Ching, J. Reader, A.M. Fulton, Eicosanoids in Cancer: Prostaglandin E(2) Receptor 4 in Cancer Therapeutics and Immunotherapy, *Frontiers in pharmacology*, 11 (2020) 819.

[28] P. Saintigny, E. Massarelli, S. Lin, Y.H. Ahn, Y. Chen, S. Goswami, B. Erez, M.S. O'Reilly, D. Liu, J.J. Lee, L. Zhang, Y. Ping, C. Behrens, L.M. Solis Soto, J.V. Heymach, E.S. Kim, R.S. Herbst, S.M. Lippman, Wistuba, II, W.K. Hong, J.M. Kurie, J.S. Koo, CXCR2 expression in tumor cells is a poor prognostic factor and promotes invasion and metastasis in lung adenocarcinoma, *Cancer research*, 73 (2013) 571-582.

[29] M.P. Keane, J.A. Belperio, Y.Y. Xue, M.D. Burdick, R.M. Strieter, Depletion of CXCR2 inhibits tumor growth and angiogenesis in a murine model of lung cancer, *Journal of immunology* (Baltimore, Md. : 1950), 172 (2004) 2853-2860.

[30] D.D. Dong, H. Zhou, G. Li, GPR78 promotes lung cancer cell migration and metastasis by activation of Gαq-Rho GTPase pathway, *BMB reports*, 49 (2016) 623-628.

[31] B. Wang, M.D. Wu, Y.J. Lan, C.Y. Jia, H. Zhao, K.P. Yang, H.N. Liu, S.Z. Sun, R.C. Tao, X.D. Lu, Z.F. Zhang, PAR2 promotes malignancy in lung adenocarcinoma, *American journal of translational research*, 16 (2024) 7416-7426.

[32] N. Michel, N. Heuzé-Vourc'h, E. Lavergne, C. Parent, M.L. Jourdan, A. Vallet, S. Lochmann, O. Musso, P. Reverdiau, Y. Courty, Growth and survival of lung cancer cells: regulation by kallikrein-related peptidase 6 via activation of proteinase-activated receptor 2 and the epidermal growth factor receptor, *Biological chemistry*, 395 (2014) 1015-1025.

[33] S.H. Huang, Y. Li, H.G. Chen, J. Rong, S. Ye, Activation of proteinase-activated receptor 2 prevents apoptosis of lung cancer cells, *Cancer investigation*, 31 (2013) 578-581.

[34] G. Ma, C. Wang, B. Lv, Y. Jiang, L. Wang, Proteinase-activated receptor-2 enhances Bcl2-like protein-12 expression in lung cancer cells to suppress p53 expression, *Archives of medical science : AMS*, 15 (2019) 1147-1153.

[35] C.C. Tsai, Y.T. Chou, H.W. Fu, Protease-activated receptor 2 induces migration and promotes Slug-mediated epithelial-mesenchymal transition in lung adenocarcinoma cells, *Biochimica et biophysica acta. Molecular cell research*, 1866 (2019) 486-503.

[36] K. Wu, L. Xu, L. Cheng, PAR2 Promoter Hypomethylation Regulates PAR2 Gene Expression and Promotes Lung Adenocarcinoma Cell Progression, *Computational and mathematical methods in medicine*, 2021 (2021) 5542485.

[37] M.C. Ghosh, P.S. Makena, V. Gorantla, S.E. Sinclair, C.M. Waters, CXCR4 regulates migration of lung alveolar epithelial cells through activation of Rac1 and matrix metalloproteinase-2, *American journal of physiology. Lung cellular and molecular physiology*, 302 (2012) L846-856.

[38] Y.C. Huang, Y.C. Hsiao, Y.J. Chen, Y.Y. Wei, T.H. Lai, C.H. Tang, Stromal cell-derived factor-1 enhances motility and integrin up-regulation through CXCR4, ERK and NF-kappaB-dependent

- pathway in human lung cancer cells, *Biochemical pharmacology*, 74 (2007) 1702-1712.
- [39] J. Zuo, M. Wen, S. Li, X. Lv, L. Wang, X. Ai, M. Lei, Overexpression of CXCR4 promotes invasion and migration of non-small cell lung cancer via EGFR and MMP-9, *Oncology letters*, 14 (2017) 7513-7521.
- [40] L. Su, J. Zhang, H. Xu, Y. Wang, Y. Chu, R. Liu, S. Xiong, Differential expression of CXCR4 is associated with the metastatic potential of human non-small cell lung cancer cells, *Clinical cancer research : an official journal of the American Association for Cancer Research*, 11 (2005) 8273-8280.
- [41] M.M. Bi, B. Shang, Z. Wang, G. Chen, Expression of CXCR4 and VEGF-C is correlated with lymph node metastasis in non-small cell lung cancer, *Thoracic cancer*, 8 (2017) 634-641.
- [42] J. Yang, B. Zhang, Y. Lin, Y. Yang, X. Liu, F. Lu, Breast cancer metastasis suppressor 1 inhibits SDF-1 $\alpha$ -induced migration of non-small cell lung cancer by decreasing CXCR4 expression, *Cancer letters*, 269 (2008) 46-56.
- [43] D. Fahham, I.D. Weiss, M. Abraham, K. Beider, W. Hanna, Z. Shlomai, O. Eizenberg, G. Zamir, U. Izhar, O.M. Shapira, A. Peled, O. Wald, In vitro and in vivo therapeutic efficacy of CXCR4 antagonist BKT140 against human non-small cell lung cancer, *The Journal of thoracic and cardiovascular surgery*, 144 (2012) 1167-1175.e1161.
- [44] X. Ye, Q. Tao, Y. Wang, Y. Cheng, R. Lotan, Mechanisms underlying the induction of the putative human tumor suppressor GPRC5A by retinoic acid, *Cancer biology & therapy*, 8 (2009) 951-962.
- [45] Y. Chen, J. Deng, J. Fujimoto, H. Kadara, T. Men, D. Lotan, R. Lotan, Gprc5a deletion enhances the transformed phenotype in normal and malignant lung epithelial cells by eliciting persistent Stat3 signaling induced by autocrine leukemia inhibitory factor, *Cancer research*, 70 (2010) 8917-8926.
- [46] J. Deng, J. Fujimoto, X.F. Ye, T.Y. Men, C.S. Van Pelt, Y.L. Chen, X.F. Lin, H. Kadara, Q. Tao, D. Lotan, R. Lotan, Knockout of the tumor suppressor gene Gprc5a in mice leads to NF- $\kappa$ B activation in airway epithelium and promotes lung inflammation and tumorigenesis, *Cancer prevention research (Philadelphia, Pa.)*, 3 (2010) 424-437.
- [47] H. Song, B. Sun, Y. Liao, D. Xu, W. Guo, T. Wang, B. Jing, M. Hu, K. Li, F. Yao, J. Deng, GPRC5A deficiency leads to dysregulated MDM2 via activated EGFR signaling for lung tumor development, *International journal of cancer*, 144 (2019) 777-787.
- [48] X. Lin, S. Zhong, X. Ye, Y. Liao, F. Yao, X. Yang, B. Sun, J. Zhang, Q. Li, Y. Gao, Y. Wang, J. Liu, B. Han, Y.E. Chin, B.P. Zhou, J. Deng, EGFR phosphorylates and inhibits lung tumor suppressor GPRC5A in lung cancer, *Molecular cancer*, 13 (2014) 233.
- [49] H. Zhou, S. Di Palma, C. Preisinger, M. Peng, A.N. Polat, A.J. Heck, S. Mohammed, Toward a comprehensive characterization of a human cancer cell phosphoproteome, *Journal of proteome research*, 12 (2013) 260-271.
- [50] G. Weckbecker, I. Lewis, R. Albert, H.A. Schmid, D. Hoyer, C. Bruns, Opportunities in somatostatin research: biological, chemical and therapeutic aspects, *Nature reviews. Drug discovery*, 2 (2003) 999-1017.
- [51] J. Guillermet, N. Saint-Laurent, P. Rochaix, O. Cuvillier, T. Levade, A.V. Schally, L. Pradayrol, L. Buscail, C. Susini, C. Bousquet, Somatostatin receptor subtype 2 sensitizes human pancreatic cancer cells to death ligand-induced apoptosis, *Proceedings of the National Academy of Sciences of the United States of America*, 100 (2003) 155-160.
